# Supplementary material for: Long-term prediction of major coronary or ischaemic stroke event in a low-incidence Southern European population: model development and evaluation of clinical utility
Source: PubMed Central journal article supplement — BMJ Open. 2013 Nov 12;3(11):e003630. doi: 10.1136/bmjopen-2013-003630 (PMC3831155; doi:10.1136/bmjopen-2013-003630), 2013-11-12
Supplement: bmjopen-2013-003630.draft_revisions.pdf [file bmjopen-2013-003630.draft_revisions.pdf]

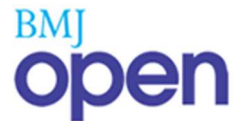

**Long-term prediction of major coronary or ischemic stroke event in a low-incidence European population: model development and evaluation of clinical utility**

|                                 |                                                                                                                                                                                                                                                                                                                                                                                                                                                                                                                                                                                                                                                                             |
|---------------------------------|-----------------------------------------------------------------------------------------------------------------------------------------------------------------------------------------------------------------------------------------------------------------------------------------------------------------------------------------------------------------------------------------------------------------------------------------------------------------------------------------------------------------------------------------------------------------------------------------------------------------------------------------------------------------------------|
| Journal:                        | <i>BMJ Open</i>                                                                                                                                                                                                                                                                                                                                                                                                                                                                                                                                                                                                                                                             |
| Manuscript ID:                  | bmjopen-2013-003630                                                                                                                                                                                                                                                                                                                                                                                                                                                                                                                                                                                                                                                         |
| Article Type:                   | Research                                                                                                                                                                                                                                                                                                                                                                                                                                                                                                                                                                                                                                                                    |
| Date Submitted by the Author:   | 20-Jul-2013                                                                                                                                                                                                                                                                                                                                                                                                                                                                                                                                                                                                                                                                 |
| Complete List of Authors:       | Veronesi, Giovanni; Università degli Studi dell'Insubria, Dipartimento di Medicina Clinica e Sperimentale<br>Gianfagna, Francesco; Università degli Studi dell'Insubria, Dipartimento di Medicina Clinica e Sperimentale<br>Chambless, Lloyd; University of North Carolina at Chapel Hill, Biostatistics<br>Giampaoli, Simona; Istituto Superiore di Sanità,<br>Mancia, Guiseppe; Università di MILano-Bicocca, Dipartimento di medicina clinica e prevenzione<br>Cesana, Giancarlo; Università di MILano-Bicocca, Dipartimento di medicina clinica e prevenzione<br>Ferrario, Marco; Università degli Studi dell'Insubria, Dipartimento di Medicina Clinica e Sperimentale |
| <b>Primary Subject Heading</b>: | Epidemiology                                                                                                                                                                                                                                                                                                                                                                                                                                                                                                                                                                                                                                                                |
| Secondary Subject Heading:      | Cardiovascular medicine                                                                                                                                                                                                                                                                                                                                                                                                                                                                                                                                                                                                                                                     |
| Keywords:                       | Cardiac Epidemiology < CARDIOLOGY, Ischaemic heart disease < CARDIOLOGY, PREVENTIVE MEDICINE                                                                                                                                                                                                                                                                                                                                                                                                                                                                                                                                                                                |
|                                 |                                                                                                                                                                                                                                                                                                                                                                                                                                                                                                                                                                                                                                                                             |

SCHOLARONE™  
Manuscripts

1  
2  
3  
4 **Long-term prediction of major coronary or ischemic stroke event in a low-incidence**  
5 **European population: model development and evaluation of clinical utility**  
6  
7

8  
9 **Short Title: Clinical utility of long-term CVD risk prediction in primary prevention**  
10

11  
12 Giovanni Veronesi<sup>1</sup>, Francesco Gianfagna<sup>1</sup>, Lloyd E Chambless<sup>2</sup>, Simona Giampaoli<sup>3</sup>,  
13 Giuseppe Mancia<sup>4</sup>, Giancarlo Cesana<sup>4</sup>, and Marco M Ferrario<sup>1</sup>.  
14

- 15  
16  
17 1. Research Centre in Epidemiology and Preventive Medicine, Department of Clinical and  
18 Experimental Medicine. University of Insubria, Varese, Italy.  
19 2. Department of Biostatistics, University of North Carolina at Chapel Hill, Chapel Hill, NC,  
20 USA  
21 3. Istituto Superiore di Sanità, Roma, Italy  
22 4. Department of Clinical Medicine, Prevention and Health Biotechnology, University of  
23 Milano-Bicocca, Milano, Italy  
24  
25  
26  
27  
28  
29  
30  
31  
32  
33

34 Corresponding author:  
35

36 Dr Giovanni Veronesi  
37 Research Centre in Epidemiology and Preventive Medicine  
38 University of Insubria  
39 Via O Rossi, 9 - Padiglione Rossi, I piano  
40 I-21100 Varese, Italy  
41 Phone +39-0332-270696  
42 Fax +39-0332-278986  
43 [giovanni.veronesi@uninsubria.it](mailto:giovanni.veronesi@uninsubria.it)  
44  
45  
46  
47  
48  
49

50 **Key words:** long-term risk, prediction, cardiovascular disease, clinical utility, primary  
51 prevention  
52

53 **Word count: 2908**  
54  
55  
56  
57  
58  
59  
60

## ARTICLE SUMMARY

### Article focus

- Primary prevention of cardiovascular disease (CVD) has been recently moved towards the concepts of “lifetime” and “long-term” risk, especially in young subjects and women.
- There is no long-term risk prediction model available for European populations; in addition, the evaluation of the clinical benefit of long-term prediction has not been provided so far.
- We aim to develop a 20-year risk score equation in a northern Italian population of men and women considered at low incidence of major cardiovascular events; and to evaluate the clinical utility of the model for risk stratification in primary CVD prevention program.

### Key Messages

- In our population, the 20-year risk model had satisfactory discrimination ability as compared to short-term risk prediction. The importance of long-term prediction for early identification of young subjects and women at increased likelihood of event during their remaining lifespan is confirmed.
- Risk stratification based on the predicted 20-year risk had a better clinical Net Benefit with respect to a stratification based on the number of risk factors, in men and women.
- In both genders, the optimal treatment allocation based on 20-year risk can be determined according to different public health strategies, i.e. either to reduce the fraction of events potentially un-prevented or to avoid un-necessary treatment.

### Strengths and limitations of this study

- Our sample comprises subjects drawn from a representative northern Italian population, with a satisfactory participation rate. We also mention the high-quality of follow-up

1  
2  
3  
4 procedures, including case ascertainment for non-fatal events and a consistent event  
5  
6 validation according to MONICA criteria over the whole follow-up period.  
7

- 8  
9 ■ Our 20-year risk prediction model is the first attempt to characterize long-term risk of  
10  
11 first coronary or ischemic stroke event in a low-incidence European population. To allow  
12  
13 applying our equation to different populations, as Supplementary Material we provide the  
14  
15 baseline survival term as well as the calibration slope. However, an external validation  
16  
17 study might be desirable. We also remind that our underlying population is characterized  
18  
19 by high levels of industrialization and urbanization, with one of the highest average  
20  
21 incomes in Italy. Caution is therefore required before generalizing our findings to  
22  
23 different contexts.  
24  
25  
26  
27

## 28 29 **ABSTRACT**

30  
31  
32 **Objective.** To develop a long-term prediction model of first major cardiovascular event and  
33  
34 to assess its clinical utility in a low-incidence European population.  
35

36  
37 **Setting.** Four independent population-based cohorts enrolled between 1986 and 1993 in  
38  
39 Northern Italy.  
40

41  
42 **Participants and methods.** N=5,247 35-69 years old men and women free of cardiovascular  
43  
44 disease at baseline. Absolute 20-year risk of first fatal or non-fatal coronary or ischemic  
45  
46 stroke event (MONICA validated) was estimated from gender-specific Cox models.  
47

48  
49 **Main outcome measures.** Model discrimination (Area Under the ROC-Curve, AUC). “High-  
50  
51 risk” subjects were defined based on several threshold values for the 20-year predicted risk.  
52  
53 Clinical utility was defined in terms of fraction of missed events (events among those  
54  
55  
56  
57  
58  
59  
60

1  
2  
3  
4 considered at low-risk) and unnecessary treatment (false:true positives ratio). A Net Benefit  
5  
6 curve was also provided.  
7

8 **Results.** Kaplan-Meier 20-year risk was 16.1% in men (315 events) and 6.1% in women (123  
9  
10 events). Model discrimination (AUC=0.737 in men, 0.801 in women) did not change  
11  
12 significantly as compared to 10-year prediction time interval. In men, with respect to risk  
13  
14 stratification based on the number of risk factors, a 20% predicted risk cut-off would miss  
15  
16 less events (36% vs. 50%) and reduce unnecessary treatment (false:true positive ratio: 2.2 vs.  
17  
18 3.0); the Net Benefit was higher over the whole range of threshold values. Similar  
19  
20 considerations hold for women.  
21  
22

23  
24 **Conclusions.** Long-term prediction has good discrimination ability and is clinically useful for  
25  
26 risk stratification in primary prevention. A clinical utility analysis is recommended to identify  
27  
28 the optimal stratification according to different public health goals.  
29  
30  
31  
32  
33  
34  
35  
36  
37  
38  
39  
40  
41  
42  
43  
44  
45  
46  
47  
48  
49  
50  
51  
52  
53  
54  
55  
56  
57  
58  
59  
60

## INTRODUCTION

Current European and American guidelines for primary prevention of major coronary and stroke events recommend the use of a multivariable risk prediction method to identify high risk subjects [1, 2]. Several risk scores are available in different US [3, 4] and European [5] populations of middle-aged adults, including the Italian one [6], to estimate the risk of first fatal and non-fatal cardiovascular event over a 10 year time interval. Primary prevention however has been recently moved towards the concepts of “lifetime” [7] and “long-term” risks [8], motivated also by the increasing life expectancy in western Countries. To this extent, 10-year risk prediction models are inadequate to distinguish between those at both low short-term and long-term risks, and those at low short-term but at elevated long-term risk due to the presence of non-optimal risk factors levels [9-11]. In the Framingham Study population, an unfavorable risk factor profile led to an increased 30-year risk of first cardiovascular event, independently on the age at the risk factors assessment [10]. In a representative sample of the Italian population, about 80% of individuals classified at low 10-year risk had increased lifetime risk according to US definition ( $\geq 40\%$ ), potentially leading to a consistent number of un-prevented events that might have been prevented if lifetime risk had been considered [11]. This group was largely composed of women and young subjects, suggesting that long-term prediction models for risk stratification may be even more beneficial in populations at low incidence of cardiovascular disease [12]. To this extent, the development of a specific long-term risk prediction should be preferred with respect to re-calibration of risk models derived in high-incidence countries [13]. However, extending the range of risk prediction is not a straightforward operation. Although several studies have shown that a single measurement of risk factor is predictive of future events after 30 plus years [10, 14], behavioral changes and risk factors modification may affect model

1  
2  
3  
4 discrimination. High-quality follow-up data, with a consistent event definition and validation  
5  
6 over-time, are also required. Finally, subjects' stratification in risk categories is often based  
7  
8 on arbitrary cut-points of absolute risk [15] which may show no benefit in clinical practice  
9  
10 [16]. The evaluation of the clinical benefit of long-term prediction by means of some  
11  
12 standard measure [17] has not been provided so far and is therefore required [8].

13  
14 The aim of the present paper is to develop a 20-year risk score equation in a European  
15  
16 population of men and women considered at low incidence of major cardiovascular events. In  
17  
18 addition to standard model calibration and discrimination tools, we evaluate the clinical  
19  
20 utility of the model for risk stratification.  
21  
22  
23

## 24 **METHODS**

### 25 **Study population**

26  
27 The Brianza population comprises residents in 173 municipalities in the area between Milan  
28  
29 and the Swiss border, Northern Italy. The CAMUNI study includes four independent  
30  
31 population surveys carried out between 1986 and 1994 as part of either the WHO-MONICA  
32  
33 Project[3 surveys; 18] or the PAMELA study [19]. Participation rates were 70.1%, 67.2%,  
34  
35 and 70.8% for the three MONICA surveys, respectively, and 64% for the PAMELA Study,  
36  
37 with no differences between men and women. Both the baseline screening and the follow-up  
38  
39 for all the surveys were approved by the ethical committee of the Monza Hospital.  
40  
41  
42  
43

### 44 **Baseline assessment of risk factors**

45  
46 Cardiovascular risk factors were collected at baseline strictly adhering to the standardized  
47  
48 procedures and quality standards of the WHO-MONICA Project [20]. Height and weight  
49  
50 were measured on subjects without shoes and wearing light clothing. Trained technicians  
51  
52 collected blood pressure at right arm on subjects in sitting position and at rest, using a  
53  
54 standard mercury sphygmomanometer equipped with two side cuff bladders, for normal and  
55  
56  
57  
58  
59  
60

1  
2  
3  
4 obese subjects. Systolic and diastolic blood pressure were assessed twice, at 5 minutes apart,  
5  
6 recording the first and fifth phase of the Korotkoff sounds. The study variable for systolic  
7  
8 blood pressure is the average of the two measurements. Venous blood specimens were taken  
9  
10 from the ante-cubital vein on fasting subjects (12 hours or more). Serum total cholesterol,  
11  
12 HDL-cholesterol and blood glucose were determined using the enzymatic methods; HDL-  
13  
14 cholesterol fraction was separated using the Phosphotungstate-Mg<sup>++</sup> method [20]. A  
15  
16 standardized interview was administered to participants by trained interviewers. Information  
17  
18 on the use of anti-hypertensive treatment in the last two weeks was dichotomised as yes/no;  
19  
20 similarly, cigarette smoking habit was dichotomised as current versus past/never smokers.  
21  
22 Diabetes mellitus was defined using self-reported diagnoses, information on insulin and oral  
23  
24 hypoglycaemic treatments and fasting blood glucose exceeding 7 mmol/L (126 mg/dl). The  
25  
26 presence at baseline of a previous history of MI, unstable angina pectoris, cardiac  
27  
28 revascularization or stroke was defined based on self-reported information.  
29  
30  
31  
32

### 33 **Study endpoint and follow-up procedures**

34  
35 The study endpoint is defined as the occurrence of first major coronary event (myocardial  
36  
37 infarction, acute coronary syndrome and coronary revascularization) as well as for first  
38  
39 ischemic stroke or carotid endarterectomy, fatal and non-fatal [13]. Data completeness for  
40  
41 fatal events was assured through a systematic collection of death certificates provided by  
42  
43 local health units; vital status and death certificates were available for 99% of the subjects.  
44  
45 Suspected out-of-hospital deaths were investigated through interview of relatives. Suspected  
46  
47 hospitalized coronary (discharge code ICD-IX 410 or 411 and ICD-IX CM 36.0-9 for  
48  
49 coronary revascularization) and stroke events (ICD-IX 430-432, 434, 436; ICD-IX CM  
50  
51 38.01-39.22 or 39.50-39.52 with at least one 430-438 as discharge code, for carotid  
52  
53 endarterectomy) were identified through deterministic and probabilistic record linkages with  
54  
55  
56  
57  
58  
59  
60



1  
2  
3  
4 regional hospital discharge databases, obtaining a satisfactory performance in case finding, as  
5 reported [18, 21]. All acute events were investigated and validated according to the MONICA  
6 diagnostic criteria [20]; the ischemic subtype for stroke was attributed after review of the  
7  
8 available clinical information.  
9  
10

### 11 12 13 **Statistical analysis**

14  
15 The CUORE Project 10-year risk equation for the Italian population [6, 18] constituted the  
16  
17 base for the development of the 20-year risk prediction model. We considered gender-  
18  
19 specific Cox regression models with age, total cholesterol, HDL-cholesterol, systolic blood  
20  
21 pressure, anti-hypertensive treatment, cigarette smoking and diabetes. After a preliminary  
22  
23 check on linearity, total- and HDL-cholesterol were included in the model as categorical  
24  
25 variables in four standard classes [4, 22]. The interaction between systolic blood pressure and  
26  
27 anti-hypertensive treatment was not statistically significant (p-value 0.84 in men and 0.12 in  
28  
29 women, respectively). Finally, no violations in the proportional hazard assumption were  
30  
31 observed using a standard test for time-dependent variables.  
32  
33

34  
35 Model calibration was assessed through the Grønnesby-Bogan goodness-of-fit test [23]. The  
36  
37 Area Under the ROC-curve (AUC), as well as sensitivity and specificity in the top and  
38  
39 bottom predicted risk quintiles, were computed taking censorship into account [24].  
40

41  
42 Correction for over-optimism and confidence intervals for the AUC were obtained through  
43  
44 1000 bootstrapped samples [25]. To assess the hypothesis of a loss in discrimination ability  
45  
46 due to a longer prediction period, we estimated the 10-year predicted probability of event in  
47  
48 our database, using the same set of risk factors but with shorter follow-up period, i.e. up to  
49  
50 the end of 2002 for all the subjects. We then compared the AUC of both models, by  
51  
52 considering bootstrapped confidence intervals for the difference in the betas.  
53  
54  
55  
56  
57  
58  
59  
60

1  
2  
3  
4 To assess the clinical utility of the long-term model for risk stratification, we considered two  
5  
6 different public health goals. One is to decrease the number of events occurring among those  
7  
8 considered at “low-risk”. If we assume that a subject classified at “high risk” will be targeted  
9  
10 for prevention (either lifestyle intervention or treatment), any event occurring outside this  
11  
12 category is “not-identified” or “missed” by the prevention strategy. The second strategy aims  
13  
14 instead to reduce un-necessary treatment, by decreasing the number of non-events among  
15  
16 those considered at “high-risk”. Under the two scenarios, “high-risk” subjects are defined as  
17  
18 those with predicted risk above a certain cut-off value. Clinical utility is defined in terms of  
19  
20 *i)* fraction of “missed” events; *ii)* probability of event among those classified at high risk; and  
21  
22 *iii)* false positive/true positive ratio, for several threshold values in the 20-year predicted risk.  
23  
24 We also provide a decision curve analysis based on the net benefit: Net Benefit = (true  
25  
26 positives - w\*false positives)/n, where n is the sample size and the weight w represents the  
27  
28 ratio between the harm of un-necessary treatment and the harm of missing a case at that given  
29  
30 value of predicted risk [17]. All the analyses were conducted using the SAS software 9.2.  
31  
32  
33  
34

## 35 RESULTS

36  
37 N=5,426 (2,703 men) subjects were enrolled in the age range 35-69 years. N=205 subjects  
38  
39 (3.8%; n=14 events) had at least one missing data; we considered data imputation (R  
40  
41 *transcan* function, [26]) and excluded only those with missing values in more than 4  
42  
43 covariates of interest (n=6 men and n=3 women). Finally n=120 men and n=45 women with a  
44  
45 positive history of CVD at baseline were also excluded, reducing the sample size to 2,574  
46  
47 men and 2,673 women.  
48  
49

50  
51 Baseline characteristics of the study population, by gender, are shown in **Table 1**. During a  
52  
53 median follow-up time of 15 years (interquartile range: 12-20), we observed 315 first CVD  
54  
55  
56  
57  
58  
59  
60

1  
2  
3  
4 events in men (233 coronary events) and 123 in women (n=85 coronary events). The Kaplan-  
5  
6 Meier estimate for 20-year risk was 16.1% and 6.1% in men and women, respectively.  
7  
8

### 9 **Model development**

10  
11 The beta-coefficients for the 20-year risk prediction model, as well as the baseline survival  
12  
13 term and the calibration slope [25], are provided in the Supplementary Material (**Table S1**).  
14

15 All the risk factors were statistically significant, except for anti-hypertensive treatment,  
16  
17 though its point estimate reflected a 30% increase in hazard in both men and women; the  
18  
19 variable was retained in the model for comparability with the short-term CUORE model [6].  
20  
21 There were no significant differences in the set of beta estimates for the 20-year model as  
22  
23 compared to those from the 10-year risk model for the risk factors in the model (data not  
24  
25 shown). The model calibration was satisfactory, in men (Grønnesby-Bogan goodness-of-fit  
26  
27 chi-square 6.7, p-value 0.67) and in women (chi-square 9.6, p-value 0.38).  
28  
29

30  
31 We found no statistically significant difference in the overall discrimination ability between  
32  
33 long- and short-term prediction models, in men (0.736 vs. 0.731) and in women (0.801 vs.  
34  
35 0.816; **Table 2**). Only 5% of 20-year events in men occurred among subjects with a predicted  
36  
37 risk below the 20<sup>th</sup> percentile (bottom quintile); the corresponding figure in women is 2%.  
38

39  
40 The relative risk of event for being above the 80<sup>th</sup> percentile vs. below the 20<sup>th</sup> percentile of  
41  
42 20-year risk was 9.5 (i.e. 35.1/3.7) in men and 22.4 (i.e. 20.2/0.9) in women. Finally, the  
43  
44 value of the 80<sup>th</sup> percentile for 20-year risk was more than twice as high than the similar  
45  
46 percentile for 10-year risk in men (26.8 vs. 10.8) and more than three times as high in women  
47  
48 (10.1 vs. 3.0). A similar consideration holds for the 20<sup>th</sup> percentile of risk or the median  
49  
50 value.  
51

### 52 **Clinical utility**

1  
2  
3  
4 **Table 3a** and **Table 3b** describe strategies for the identification of high-risk subjects, based  
5 on predicted 20-year risk, in men and women respectively. A cut-off value of 10% twenty  
6 year risk in men would result in a 9% of “missed” events (i.e. events among those with  
7 predicted risk below the cut-point), with a probability of event of 23% and one true positive  
8 for every 3.4 false positive subjects (**Table 3a**). In the second scenario, by choosing the 20%  
9 twenty year risk threshold value, the fraction of missed events was 36%. Note that about 30%  
10 of events occurred for a predicted 20-year risk between 20% and 30%. Finally, using the  
11 number of risk factors to define high risk subjects would result in a higher fraction of missed  
12 events, with no changes in specificity or in the prevalence of subjects considered at high risk.  
13 Among women, a cut-off value of 2% would result in a 5% of missed events, with a  
14 probability of event of 9% and a true positive for every 10.1 false positive women (**Table**  
15 **3b**). In the second scenario, the probability of event among those with absolute risk greater  
16 than 10% was 20.4%, with a true positive for every 3.9 false positive subjects. However, the  
17 fraction of missed events would be 32%; this number can be reduced by lowering the cut-off  
18 value to 8%. By considering at high risk those with 2 or more risk factor would result in a  
19 higher fraction of missed events, with no gain in specificity or in the probability of event in  
20 the group. **Figure 1** illustrates the decision curve analysis based on the Net Benefit [17], for  
21 men (left) and women (right). The figure suggests a greater net benefit for the predicted risk  
22 with respect to the number of risk factors over the whole range of values, thus generalizing  
23 the findings from Table 3a and Table 3b.

## 48 **DISCUSSION**

49  
50 In this paper we present the 20-year prediction model of first major coronary or ischemic  
51 stroke event in a Northern Italian population of men and women aged 35 to 69 years at  
52 baseline. To our knowledge, this is the first long-term prediction model in a low-incidence,  
53  
54  
55  
56  
57  
58  
59  
60

1  
2  
3  
4 European population. The discrimination ability of the long-term model did not significantly  
5 drop with respect to a 10-year risk prediction model derived on the same population. Risk  
6 stratification based on the predicted 20-year risk can be modulated according to different  
7 prevention aims, i.e. either to reduce the fraction of events potentially un-prevented or to  
8 avoid un-necessary treatment. Under both scenarios, the predicted 20-year risk showed an  
9 overall better Net Benefit with respect to a risk stratification based on the number of risk  
10 factors.

11  
12 Our data confirmed previous findings on predictiveness of a single measurement of risk  
13 factors on long-term CVD risk, in the Italian [27] as well as in other populations [10, 14].  
14 Event discrimination for the 20-year risk prediction model did not change significantly from  
15 10-year's, although in women it decreased from 0.814 to 0.801. In the Framingham Offspring  
16 Study updating the baseline measurement of blood pressure and lipids with a later assessment  
17 poorly affected model discrimination and reclassification [28] and cardiometabolic risk  
18 factors clustering has been found to be quite stable over time [29].

19  
20 As in the Framingham population, in our study the long-term predicted risk was more than  
21 simply  $n$ -times the short-term risk prediction [10]. In addition in the age range 35 to 49  
22 years, the long-term predicted risk in subjects with 1 or more non-optimal or elevated risk  
23 factors (defined as in [7]) was 3-times the short-term risk in men, and 4-times in women (see  
24 **Figure S1** in the Supplementary Material). This conveys the importance of long-term  
25 prediction for early identification of young subjects and women at increased likelihood of  
26 event during their remaining lifespan. We observed in our data a modest net reclassification  
27 improvement (computed as in [24]) for the 20-year risk prediction model over the re-  
28 calibrated 10-year risk, in men (1.8%) and in women (4.5%). The net reclassification  
29 increased when we considered subjects with a low 10-year predicted risk but a cluster of 2 or  
30  
31  
32  
33  
34  
35  
36  
37  
38  
39  
40  
41  
42  
43  
44  
45  
46  
47  
48  
49  
50  
51  
52  
53  
54  
55  
56  
57  
58  
59  
60

1  
2  
3  
4 more risk factors (5.4% and 7.6% in men and women, respectively; data not shown).  
5  
6  
7 Subjects' stratification is often based on arbitrarily-chosen thresholds of predicted risk [15],  
8  
9 which may limit the clinical utility of risk prediction models [16]. We considered two  
10  
11 strategies for the identification of "high-risk" subjects with contrasting goals, either to  
12  
13 decrease the fraction of missed events or to decrease un-necessary treatment. These can be  
14  
15 implemented by choosing threshold values for the predicted risk driven by either sensitivity  
16  
17 or by specificity, respectively. Despite the lowering costs of statin treatment with respect to  
18  
19 the costs of one un-prevented event, the high sensitivity scenario might not be cost-effective  
20  
21 [30]. These two scenarios might be combined to adopt a more complex risk stratification, as  
22  
23 often present in clinical practice [1-2, 12]. For instance, if we consider at "low-risk" the 36%  
24  
25 of men with 20-year absolute risk less than 10%, the fraction of missed events would be 9%,  
26  
27 i.e. 31 first events in 20 years. About 31% of men with absolute risk between 10% and 20%  
28  
29 could be addressed for lifestyle modification or treatment according to the presence of  
30  
31 specific risk factors; this category accounts for about 20% of cases. Finally, the 33% of men  
32  
33 with predicted risk above the 20% could be targeted with treatment intervention; they account  
34  
35 for 68% of events, and out of 3.2 treated men, one is a case. A similar stratification can be  
36  
37 provided for women, with different threshold values reflecting gender-specific underlying  
38  
39 risk as for the cardiovascular age assessment [15].  
40  
41  
42  
43

44 Among the study strengths and limitations, our sample comprises subjects drawn from a  
45  
46 representative northern Italian population, with a satisfactory participation rate. The  
47  
48 underlying population is characterized by high levels of industrialization and urbanization,  
49  
50 with one of the highest average incomes in Italy. As Supplementary Material we provide the  
51  
52 baseline survival term as well as a calibration slope [25] to allow applying our equation to  
53  
54 different contexts. However, a validation study in a different population might be desirable to  
55  
56  
57  
58  
59  
60

1  
2  
3  
4 investigate the generalizability of our findings. We also mention a high-quality of follow-up  
5  
6 procedures, including case ascertainment for non-fatal events [21] and a consistent event  
7  
8 validation according to MONICA criteria, resulting in a Standardized Incidence Rate for the  
9  
10 study cohorts above 1 over the whole follow-up period [18]. Finally, the study endpoint  
11  
12 reflects the clinical need to treat the “global” ischemic risk of a given patient, and not its  
13  
14 separate components [3].  
15

16  
17  
18 In conclusions, we provide a model to predict long-term risk of first major ischemic  
19  
20 cardiovascular event in a low-incidence population. Risk stratification based on long-term  
21  
22 risk can be clinically useful, especially for young subjects and women. A clinical utility  
23  
24 analysis is required to identify the optimal stratification, according to different public health  
25  
26 goals.  
27

### 28 29 30 31 **Funding**

32  
33 This work was supported by grants from the Health Administration of Regione Lombardia  
34  
35 [grant number 10800/2009], as part of the Osservatorio Epidemiologico Cardiovascolare  
36  
37 Regionale Lombardo.  
38

### 39 40 **Competing Interests**

41  
42 None.  
43

### 44 45 **Contributors**

46  
47 Conception and design: MMF, GM, GC and GV. All authors interpreted the data and  
48  
49 critically reviewed the paper. Statistical analyses: GV, WC. GV drafted the manuscript and is  
50  
51 the guarantor. All authors have read and approved the final version of the manuscript.  
52

### 53 54 **Data sharing**

55  
56 There is no additional data available  
57  
58  
59  
60



## REFERENCES

1. Perk J, De Backer G, Gohlke H, Graham I, Reiner Z, Verschuren WM, et al. European Guidelines on cardiovascular disease prevention in clinical practice (version 2012). *Eur Heart J* 2012;33:1635-1701
2. Pearson TA, Blair SN, Daniels SR, et al. AHA Guidelines for Primary Prevention of Cardiovascular Disease and Stroke: 2002 Update : Consensus Panel Guide to Comprehensive Risk Reduction for Adult Patients Without Coronary or Other Atherosclerotic Vascular Diseases. *Circulation* 2002;106:388-391
3. D'Agostino RB, Ramachandran SV, Pencina MJ, Wolf PA, Cobain M, Massaro JM, Kannel WB. General cardiovascular risk profile for use in primary care. The Framingham Heart Study. *Circulation* 2008;117:743-753
4. Chambless LE, Folsom AR, Sharrett AR, Sorlie P, Couper D, Szklo M, Nieto FJ. Coronary heart disease risk prediction in the Atherosclerosis Risk in Communities (ARIC) study. *J Clin Epidemiol.* 2003;56:880-90
5. Conroy RM, Pyorala K, Fitzgerald AP, et al. Estimation of ten-year risk of fatal Cardiovascular disease in Europe: the SCORE project. *Eur Heart J* 2003;24:987-1003
6. Palmieri L, Panico S, Vanuzzo D, Ferrario M, Pilotto L, Segna R, Cesana G, Giampaoli S per il gruppo di ricerca del Progetto CUORE. Evaluation of the global cardiovascular absolute risk: the Progetto CUORE individual score. *Ann Ist Super Sanità* 2004;40:393-399.
7. Lloyd-Jones DM, Leip EP, Larson MG, D'Agostino RB, Beiser A, Wilson PWF, Wolf P, Levy D. Prediction of lifetime risk for cardiovascular disease by risk factor burden at 50 years of age. *Circulation* 2006;113:791-798
8. Lloyd-Jones DM. Short-term versus long-term risk for coronary artery disease: implications for lipid guidelines. *Curr Opin Lipidol* 2006;17:619-625
9. Daviglius ML, Stamler J, Pirzada A, Yan LL, Garside DB, Liu K, Wang R, Dyer AR, Lloyd-Jones DM, Greenland P. Favourable cardiovascular risk profile in young women and long-term risk of cardiovascular and all-cause mortality. *JAMA* 2004;292:1588-1592
10. Pencina MJ, D'Agostino RB, Larson MG, Massaro JM, Vasan RS. Predicting the 30-year risk of cardiovascular disease. The Framingham Heart Study. *Circulation* 2009;119:3078-3084
11. Di Castelnuovo A, Costanzo S, Persichillo M, Olivieri M, de Curtis A, Zito F, Donati MB, de Gaetano G, Iacoviello L. Distribution of short and lifetime risks for cardiovascular disease in Italians. *Eur J Prev Cardiol* 2011;19:723-730.



- 1  
2  
3  
4  
5  
6  
7  
8 12. Mosca L, Benjamin EJ, Berra K, Bezanson JL, Dolor RJ, et al. Effectiveness-  
9 based guidelines for the prevention of cardiovascular disease in women—2011 update: a  
10 guideline from the American Heart Association. *J Am Coll Cardiol* 2011;57:1404–1423  
11
- 12 13. Ferrario MM, Chiodini P, Chambless LE, Cesana G, Vanuzzo D, Panico S, Sega R,  
13 Pilotto L, Palmieri L and Giampaoli S for the CUORE Project Research Group. Prediction of  
14 coronary events in a low incidence population. Assessing accuracy of the CUORE Cohort  
15 Study prediction equation. *Int J Epidemiol* 2005;34:413-21  
16
- 17 14. Menotti A, Lanti M, Kafatos A, Nissinen A, Dontas A, Nedeljkovic S, Kromhout D, for  
18 the Seven Countries Study. The role of baseline casual blood pressure measurement and of  
19 blood pressure changes in middle age in prediction of cardiovascular and all-cause mortality  
20 occurring late in life: a cross-cultural comparison among the European cohorts of the Seven  
21 Countries Study. *J Hypertens* 2004;22:1683-1690  
22
- 23 15. Grover SA, Lowensteyn I. The challenges and benefits of cardiovascular risk assessment  
24 in clinical practice. *Can J Cardiol* 2011;27:481-487  
25
- 26 16. Collins GS, Altman DG. Predicting the 10 year risk of cardiovascular disease in the  
27 United Kingdom: independent and external validation of an updated version of QRISK2.  
28 *BMJ* 2012;344:e4181.  
29
- 30 17. Vickers AJ, Cronin AM, Elkin EB, Gonen M. Extensions to decision curve analysis, a  
31 novel method for evaluating diagnostic tests, prediction models and molecular markers. *Med  
32 Decis Making* 2008;8:53  
33
- 34 18. Ferrario M, Sega R, Chatenoud L, et al. Time trends of major coronary risk factors in a  
35 northern Italian population (1986-1994). How remarkable are socio-economic differences in  
36 an industrialised low CHD incidence country? *Int J Epidemiol* 2001;30:285-291.  
37
- 38 19. Cesana GC, De Vito G, Ferrario M, et al. Ambulatory blood pressure normalcy: The  
39 PAMELA Study. *J Hypertension Suppl* 1991;9:17-23.  
40
- 41 20. WWW-publications from the WHO MONICA Project. MONICA Manual. Available at:  
42 <http://www.thl.fi/publications/monica/manual/index.htm>.  
43
- 44 21. Fornari C, Madotto F, Demaria M, Romanelli A, Pepe P, Raciti M, Tancioni V, Chini F,  
45 Trerotoli P, Bartolomeo N, Serio G, Cesana G, Corrao G. Record-linkage procedures in  
46 epidemiology: an Italian multicentre study. *Epidemiol Prev* 2008;32:79-88.  
47
- 48 22. Wilson PW, D'Agostino RB, Levy D, Belanger AM, Silbershatz H, Kannnel WB.  
49 Prediction of coronary heart disease using risk factors category. *Circulation* 1998;97:1837-47  
50
- 51 23. May S., Hosmer DW. A simplified method of calculating an overall Goodness-of-Fit test  
52  
53  
54  
55  
56  
57  
58  
59  
60

1  
2  
3  
4 for the Cox proportional hazards model. *Lifetime Data Anal* 1998;4:109-120  
5  
6

7  
8 24. Chambless LE, Cummiskey CP, and Cui G. Several methods to assess improvement in  
9 risk prediction models: extension to survival analysis. *Statist med* 2011;30:22–28  
10

11 25. Harrel FE, Lee KL and Marck DB. Tutorial in biostatistics: multivariable prognostic  
12 models: issues in developing models, evaluating assumptions and adequacy, and measuring  
13 and reducing errors. *Statist med* 1996;15:361–387  
14

15 26. Harrel FE. R reference manual: Package ‘Hmisc’. Available at  
16 <http://cran.r-project.org/web/packages/Hmisc/Hmisc.pdf>  
17

18 27. Menotti A, Lanti M. Coronary risk factors predicting early and late coronary events.  
19 *Heart* 2003;89:19-24  
20

21 28. Bell K, Hayen A, McGeechan K, Neal B, Irwig L. Effects of additional blood pressure  
22 and lipids measurements on the prediction of cardiovascular risk. *Eur J Prev Cardiol*  
23 2012;19:1474-85  
24  
25

26 29. Camhi SM, Katzmarzyk PT. Tracking of cardiometabolic risk factor clustering from  
27 childhood to adulthood. *Int J Pediatr Obes* 2010;5:122-129  
28

29 30. Greving JP, Visseren FLJ, de Wit GA, Algra A. Statin treatment for primary prevention  
30 of vascular disease: whom to treat? Cost-effectiveness analysis. *BMJ* 2011;342:d1672.  
31  
32  
33  
34  
35  
36  
37  
38  
39  
40  
41  
42  
43  
44  
45  
46  
47  
48  
49  
50  
51  
52  
53  
54  
55  
56  
57  
58  
59  
60

## Tables and figures

**Table 1.** Baseline characteristics (mean (SD) or %) of the study population and number of incident events, by gender. Men and women, 35-69 years old, CVD-free at baseline.

|                                           | Men (n=2574) | Women (n=2673) |
|-------------------------------------------|--------------|----------------|
| Age (years)                               | 50.8 (9.1)   | 50.3 (9)       |
| Years of schooling                        | 8.5 (4.2)    | 7.3 (3.4)      |
| Total Cholesterol (mmol/L)                | 5.8 (1.1)    | 5.8 (1.1)      |
| HDL-Cholesterol (mmol/L)                  | 1.3 (0.3)    | 1.6 (0.4)      |
| Body Mass Index (Kg/m <sup>2</sup> )      | 26.2 (3.5)   | 25.6 (4.7)     |
| Systolic Blood Pressure (mmHg)            | 134.8 (19.3) | 131.6 (20.2)   |
| Diastolic Blood Pressure (mmHg)           | 85.9 (10.6)  | 82.8 (10.8)    |
| Anti-hypertensive treatment (%)           | 11.8         | 16.0           |
| Fasting plasma glucose (mmol/L)           | 5.4 (1.3)    | 5.1 (1.2)      |
| Diabetes (%)                              | 6.7          | 4.0            |
| Current smoker (%)                        | 37.1         | 19.6           |
| Incident coronary event (n)               | 233          | 85             |
| Incident ischemic strokes (n)             | 99           | 43             |
| Incident CVD event (n)                    | 315          | 123            |
| 20-year absolute risk of CVD <sup>^</sup> | 16.1         | 6.1            |

<sup>^</sup>: Kaplan-Meier estimate.

**Table 2.** Discrimination ability for the 10-year and the 20-year risk prediction models.  
Men and women, 35-69 years old, CVD-free at baseline

|                                                               | Men                     |                         | Women                   |                         |
|---------------------------------------------------------------|-------------------------|-------------------------|-------------------------|-------------------------|
|                                                               | 10-year risk            | 20-year risk            | 10-year risk            | 20-year risk            |
| <b>AUC (95% CI)</b>                                           | 0.731<br>(0.702; 0.761) | 0.737<br>(0.713; 0.764) | 0.814<br>(0.779; 0.853) | 0.801<br>(0.771; 0.833) |
| <b>Subjects with predicted risk below the 20th percentile</b> |                         |                         |                         |                         |
| 20th percentile of risk                                       | 2.3                     | 6.3                     | 0.3                     | 1.1                     |
| Fraction of events* (%)                                       | 4.4                     | 5.1                     | 1.4                     | 2.0                     |
| Probability of event in the group <sup>^</sup> (%)            | 0.8                     | 3.7                     | 0.2                     | 0.9                     |
| <b>Subjects with predicted risk above the 80th percentile</b> |                         |                         |                         |                         |
| 80th percentile of risk                                       | 10.8                    | 26.8                    | 3.0                     | 10.1                    |
| Sensitivity* (%)                                              | 49.9                    | 45.6                    | 68.7                    | 62.0                    |
| Specificity (%)                                               | 82.4                    | 85.5                    | 81.1                    | 83.1                    |
| Probability of event in the group <sup>^</sup> (%)            | 19.4                    | 35.1                    | 7.5                     | 20.2                    |

The Area Under the ROC-curve (AUC) was estimated taking censorship into account, and adjusting for over-optimism (n=1000 bootstrap).

\*: Probability of belonging to the group, given that the subject is a case. <sup>^</sup>: Kaplan-Meier estimate of the probability of event in the group.

**Table 3a.** Identification of high risk subjects based on the 20-year risk prediction model with respect to the number of risk factors, according to strategies aiming to *i*) reducing the fraction of missed events; and *ii*) reducing un-necessary treatment. Men, 35-69 years old, CVD-free at baseline

|                                                         | Subjects at high risk |       | Fraction of missed events (%) | Specificity (%) | Probability of event* (%) | FP/TP Ratio |
|---------------------------------------------------------|-----------------------|-------|-------------------------------|-----------------|---------------------------|-------------|
|                                                         | n                     | %     |                               |                 |                           |             |
| <b>Strategy a: reduce the fraction of missed events</b> |                       |       |                               |                 |                           |             |
| All subjects                                            | 2574                  | 100.0 | 0.0                           | -               | 16.1                      | 5.2         |
| 1+ Major Risk Factor <sup>#</sup>                       | 1842                  | 71.6  | 13.7                          | 32.5            | 19.5                      | 4.1         |
| 20-year absolute risk > 10%                             | 1645                  | 63.9  | 9.1                           | 41.2            | 22.9                      | 3.4         |
| 20-year absolute risk > 15%                             | 1169                  | 45.4  | 22.1                          | 60.9            | 27.7                      | 2.6         |
| <b>Strategy b: reduce un-necessary treatment</b>        |                       |       |                               |                 |                           |             |
| 2+ Major Risk Factors <sup>#</sup>                      | 828                   | 32.2  | 50.4                          | 73.6            | 24.9                      | 3.0         |
| 20-year absolute risk > 20%                             | 841                   | 32.7  | 35.7                          | 73.7            | 31.7                      | 2.2         |
| 20-year absolute risk > 30%                             | 415                   | 16.1  | 62.6                          | 88.9            | 37.4                      | 1.7         |

“Missed” events are events occurring among subjects not classified at “high risk”, i.e. with 20-year absolute risk (or a number of risk factors) below the cut-off point.

\*: Kaplan-Meier estimate of the probability of event in the group (positive predicted value).

FP = Number of False Positives; TP = Number of True Positives

<sup>#</sup>: total cholesterol > 240 mg/dl; HDL-cholesterol < 40 [men] or < 50 [women] mg/dl; systolic blood pressure > 160 mmHg; smoking; diabetes

**Table 3b.** Identification of high risk subjects based on the 20-year risk prediction model with respect to the number of risk factors, according to strategies aiming to *i*) reducing the fraction of missed events; and *ii*) reducing un-necessary treatment. Women, 35-69 years old, CVD-free at baseline

|                                                         | Subjects at high risk |       | Fraction of missed events (%) | Specificity (%) | Probability of event* (%) | FP/TP Ratio |
|---------------------------------------------------------|-----------------------|-------|-------------------------------|-----------------|---------------------------|-------------|
|                                                         | n                     | %     |                               |                 |                           |             |
| <b>Strategy a: reduce the fraction of missed events</b> |                       |       |                               |                 |                           |             |
| All subjects                                            | 2673                  | 100.0 | 0.0                           | -               | 6.1                       | 15.3        |
| 1+ Major Risk Factor <sup>#</sup>                       | 1654                  | 61.9  | 17.7                          | 40.1            | 8.2                       | 11.3        |
| 20-year absolute risk > 2%                              | 1733                  | 64.8  | 4.5                           | 37.4            | 9.0                       | 10.1        |
| 20-year absolute risk > 5%                              | 1067                  | 39.9  | 14.7                          | 63.2            | 13.1                      | 6.6         |
| <b>Strategy b: reduce un-necessary treatment</b>        |                       |       |                               |                 |                           |             |
| 2+ Major Risk Factors <sup>#</sup>                      | 640                   | 23.9  | 42.3                          | 79.5            | 14.8                      | 5.8         |
| 20-year absolute risk > 8%                              | 698                   | 26.1  | 22.7                          | 77.1            | 18.2                      | 4.5         |
| 20-year absolute risk > 10%                             | 545                   | 20.4  | 32.1                          | 82.7            | 20.4                      | 3.9         |

“Missed” events are events occurring among subjects not classified at “high risk”, i.e. with 20-year absolute risk (or a number of risk factors) below the cut-off point.

\*: Kaplan-Meier estimate of the probability of event in the group (positive predicted value).

FP = Number of False Positives; TP = Number of True Positives

#: total cholesterol > 240 mg/dl; HDL-cholesterol < 40 [men] or < 50 [women] mg/dl; systolic blood pressure > 160 mmHg; smoking; diabetes

1  
2  
3  
4  
5 **Figure 1:** Decision curve for the 20-year risk prediction model in the CAMUNI population, Northern Italy.  
6 Men (left) and women (right), 35 to 69 years old, free of CVD at baseline.  
7  
8  
9  
10  
11  
12  
13  
14  
15  
16  
17  
18  
19  
20  
21  
22  
23  
24  
25  
26  
27  
28  
29  
30  
31  
32  
33  
34

35 Net Benefit:  $(TP - w * FP) / n$ , where TP = True Positive; FP = False Positive;  $w = (\text{Absolute risk threshold}) / (1 - (\text{Absolute risk threshold}))$ ; n=sample size  
36 Number of risk factors: total cholesterol >240 mg/dl; HDL-cholesterol <40 [men] or <50 [women] mg/dl; systolic blood pressure >160 mmHg; smoking; diabetes  
37  
38  
39  
40  
41  
42  
43  
44  
45  
46  
47  
48  
49

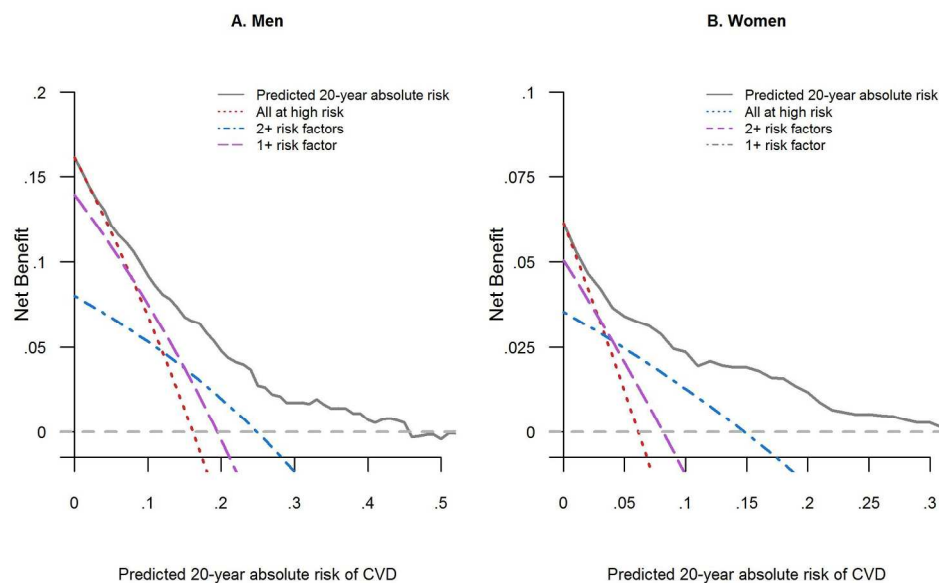

Figure 1: Decision curve for the 20-year risk prediction model in the CAMUNI population, Northern Italy. Men (left) and women (right), 35 to 69 years old, free of CVD at baseline.

Net Benefit:  $(TP - w \cdot FP) / n$ , where TP = True Positive; FP = False Positive;  $w = (\text{Absolute risk threshold}) / (1 - \text{Absolute risk threshold})$ ;  $n = \text{sample size}$

Number of risk factors: total cholesterol > 240 mg/dl; HDL-cholesterol < 40 [men] or < 50 [women] mg/dl; systolic blood pressure > 160 mmHg; smoking; diabetes

180x119mm (300 x 300 DPI)

only



## Supplementary material

**Table S1:** Beta-coefficients, standard errors and baseline survival for the 20-year risk prediction model in Northern Italy. Men and women, 35 to 69 years old, free of CVD at baseline.

|                                                       | Men   |         |         | Women |         |         |
|-------------------------------------------------------|-------|---------|---------|-------|---------|---------|
|                                                       | Beta  | SE      | p-value | Beta  | SE      | p-value |
| <b>Age (years)</b>                                    | 0.058 | 0.008   | <.0001  | 0.084 | 0.014   | <.0001  |
| <b>Total Cholesterol<sup>^</sup></b>                  |       |         |         |       |         |         |
| 200-240 mg/dl                                         | 0.388 | 0.161   |         | 0.553 | 0.287   |         |
| 240-280 mg/dl                                         | 0.690 | 0.167   | <.0001  | 0.607 | 0.310   | 0.027   |
| > 280 mg/dl                                           | 0.923 | 0.198   |         | 0.996 | 0.328   |         |
| <b>HDL-Cholesterol<sup>°</sup></b>                    |       |         |         |       |         |         |
| <45 mg/dl                                             | 0.403 | 0.160   |         | 0.804 | 0.250   |         |
| 45-50 mg/dl                                           | 0.367 | 0.186   | 0.013   | 0.364 | 0.309   | 0.015   |
| 50-60 mg/dl                                           | 0.024 | 0.177   |         | 0.261 | 0.225   |         |
| <b>Systolic Blood Pressure (mmHg)</b>                 | 0.011 | 0.003   | 0.0003  | 0.015 | 0.005   | 0.001   |
| <b>Anti-hypertensive treatment (yes/no)</b>           | 0.247 | 0.154   | 0.11    | 0.267 | 0.209   | 0.20    |
| <b>Smoking (yes/no)</b>                               | 0.521 | 0.117   | <.0001  | 0.994 | 0.216   | <.0001  |
| <b>Diabetes (yes/no)</b>                              | 0.744 | 0.163   | <.0001  | 1.020 | 0.249   | <.0001  |
| <b>Baseline 20-year survival (S<sub>0</sub>(20))*</b> |       | 0.94168 |         |       | 0.98502 |         |
| <b>G(μ)</b>                                           |       | 4.35638 |         |       | 6.20915 |         |
| <b>Calibration Slope</b>                              |       | 0.948   |         |       | 0.937   |         |

SE = Standard Error. <sup>^</sup>: reference group: total cholesterol ≤ 200 mg/dl. <sup>°</sup>: reference group: HDL-cholesterol > 60 mg/dl. \*: at the mean value for continuous RFs, and at the reference class for categorical variables. 20-year risk:  $1 - S_0(20)^{\exp(\sum \beta X - G(\mu))}$ .

Calibration slope: correction term that could be used in different population to shrink the beta-coefficients. See reference[25] for more details.

1  
2  
3  
4  
5  
6  
7  
8  
9  
10  
11  
12  
13  
14  
15  
16  
17  
18  
19  
20  
21  
22  
23  
24  
25  
26  
27  
28  
29  
30  
31  
32  
33  
34  
35  
36  
37  
38  
39  
40  
41  
42  
43  
44  
45  
46  
47  
48  
49

**Figure S1:** Distribution of predicted 10-year and 20-year risk of first major CVD event, according to the number of risk factors. Men (left) and women (right), 35 to 49 years old, free of CVD at baseline.

For peer review only

Risk factors stratification derived from Lloyd-Jones [7].  
All optimal: total cholesterol <180 mg/dl, HDL-Cholesterol  $\geq$  40 mg/dl [men] or  $\geq$  50 mg/dl [women], blood pressure <120/80 mmHg, non smoker, non diabetic;  
1+ non-optimal: total cholesterol 180 to 199 mg/dl, systolic blood pressure 120 to 139 mmHg, diastolic blood pressure 80 to 89 mmHg, non smoker, non diabetic  
1+ elevated: total cholesterol 200 to 239 mg/dl, systolic blood pressure 140 to 159 mmHg, diastolic blood pressure 90 to 99 mmHg, non smoker, non diabetic  
Major risk factor: total cholesterol  $\geq$ 240 mg/dl, HDL-Cholesterol <40 mg/dl [men] or <50 mg/dl [women], systolic blood pressure  $\geq$ 160 mmHg or treatment, diastolic blood pressure  $\geq$ 100 mmHg, smoker, or diabetic

1 **Supplementary material for the paper:**

2 **Long-term prediction of major coronary or ischemic stroke event in a low-incidence**

3 **European population: model development and evaluation of clinical utility.**

4 STROBE Statement—Checklist of items that should be included in reports of *cohort studies*

5

6

7

8

9

|                          | Item No | Recommendation                                                                                                                                                                       | Actions                                                                                                                                                                                                                                         |
|--------------------------|---------|--------------------------------------------------------------------------------------------------------------------------------------------------------------------------------------|-------------------------------------------------------------------------------------------------------------------------------------------------------------------------------------------------------------------------------------------------|
| Title and abstract       | 1       | (a) Indicate the study's design with a commonly used term in the title or the abstract                                                                                               | The study setting is clearly stated in the abstract.                                                                                                                                                                                            |
|                          |         | (b) Provide in the abstract an informative and balanced summary of what was done and what was found                                                                                  | Done                                                                                                                                                                                                                                            |
| <b>Introduction</b>      |         |                                                                                                                                                                                      |                                                                                                                                                                                                                                                 |
| Background/rationale     | 2       | Explain the scientific background and rationale for the investigation being reported                                                                                                 | See the introduction section at pages 3-4                                                                                                                                                                                                       |
| Objectives               | 3       | State specific objectives, including any prespecified hypotheses                                                                                                                     | See page 4, end of introduction section                                                                                                                                                                                                         |
| <b>Methods</b>           |         |                                                                                                                                                                                      |                                                                                                                                                                                                                                                 |
| Study design             | 4       | Present key elements of study design early in the paper                                                                                                                              | See the Methods section (pages 4-7)                                                                                                                                                                                                             |
| Setting                  | 5       | Describe the setting, locations, and relevant dates, including periods of recruitment, exposure, follow-up, and data collection                                                      | Relevant information on cohorts setting, location and periods of recruitment are provided in the paragraphs "Study population" (page 4), "Baseline assessment of risk factors" (page 4) and "Study endpoint and follow-up procedures" (page 5). |
| Participants             | 6       | (a) Give the eligibility criteria, and the sources and methods of selection of participants. Describe methods of follow-up                                                           | See the paragraphs "Study population" (page 4) and "Study endpoint and follow-up procedures" (page 5).                                                                                                                                          |
|                          |         | (b) For matched studies, give matching criteria and number of exposed and unexposed                                                                                                  | Not applicable                                                                                                                                                                                                                                  |
| Variables                | 7       | Clearly define all outcomes, exposures, predictors, potential confounders, and effect modifiers. Give diagnostic criteria, if applicable                                             | See the paragraph "Statistical analysis", page 6-7                                                                                                                                                                                              |
| Data sources/measurement | 8*      | For each variable of interest, give sources of data and details of methods of assessment (measurement). Describe comparability of assessment methods if there is more than one group | See paragraphs "Baseline assessment of risk factors" (page 4), and "Statistical analysis" (page 6-7). Exposure group: not applicable for this analysis.                                                                                         |
| Bias                     | 9       | Describe any efforts to address potential sources of bias                                                                                                                            | See the Methods section.                                                                                                                                                                                                                        |
| Study size               | 10      | Explain how the study size was arrived at                                                                                                                                            | See the first period in the "Results" section (page 7)                                                                                                                                                                                          |
| Quantitative             | 11      | Explain how quantitative variables were                                                                                                                                              | See the "Statistical Analysis" paragraph                                                                                                                                                                                                        |

10

11

12

13

14

15

16

17

18

19

20

21

22

23

24

25

26

27

28

29

30

31

32

33

34

35

36

37

38

39

40

41

42

43

44

45

46

47

48

49

50

51

52

53

54

55

56

57

58

59

60

|    |                     |     |                                                                                                                                                                                                              |
|----|---------------------|-----|--------------------------------------------------------------------------------------------------------------------------------------------------------------------------------------------------------------|
| 1  | variables           |     | handled in the analyses. If applicable, (page 6)                                                                                                                                                             |
| 2  |                     |     | describe which groupings were chosen and                                                                                                                                                                     |
| 3  |                     |     | why                                                                                                                                                                                                          |
| 4  | Statistical methods | 12  | (a) Describe all statistical methods, including those used to control for confounding                                                                                                                        |
| 5  |                     |     | See the “Statistical Analysis” paragraph (page 6)                                                                                                                                                            |
| 6  |                     |     | (b) Describe any methods used to examine subgroups and interactions                                                                                                                                          |
| 7  |                     |     | See the “Statistical Analysis” paragraph (page 6)                                                                                                                                                            |
| 8  |                     |     | (c) Explain how missing data were addressed                                                                                                                                                                  |
| 9  |                     |     | See the first line in the “Results” section (page 7)                                                                                                                                                         |
| 10 |                     |     | (d) If applicable, explain how loss to follow-up was addressed                                                                                                                                               |
| 11 |                     |     | See the “Statistical Analysis” paragraph (page 6) for details on the survival analysis techniques                                                                                                            |
| 12 |                     |     | (e) Describe any sensitivity analyses                                                                                                                                                                        |
| 13 |                     |     | Not applicable                                                                                                                                                                                               |
| 14 |                     |     |                                                                                                                                                                                                              |
| 15 |                     |     |                                                                                                                                                                                                              |
| 16 |                     |     |                                                                                                                                                                                                              |
| 17 | <b>Results</b>      |     |                                                                                                                                                                                                              |
| 18 | Participants        | 13* | (a) Report numbers of individuals at each stage of study—eg numbers potentially eligible, examined for eligibility, confirmed eligible, included in the study, completing follow-up, and analysed            |
| 19 |                     |     | Participation rates are reported in the paragraph “Study population” (page 4). Exposure group: not applicable for this analysis.                                                                             |
| 20 |                     |     | (b) Give reasons for non-participation at each stage                                                                                                                                                         |
| 21 |                     |     | Not applicable                                                                                                                                                                                               |
| 22 |                     |     | (c) Consider use of a flow diagram                                                                                                                                                                           |
| 23 |                     |     | Not applicable                                                                                                                                                                                               |
| 24 | Descriptive data    | 14* | (a) Give characteristics of study participants (eg demographic, clinical, social) and information on exposures and potential confounders                                                                     |
| 25 |                     |     | See Table 1. Exposure group: not applicable for this analysis.                                                                                                                                               |
| 26 |                     |     | (b) Indicate number of participants with missing data for each variable of interest                                                                                                                          |
| 27 |                     |     | See the “Results” section, first period (page 7). Exposure group: not applicable for this analysis.                                                                                                          |
| 28 |                     |     | (c) Summarise follow-up time (eg, average and total amount)                                                                                                                                                  |
| 29 |                     |     | “Results” section, second period (page 7). Exposure group: not applicable for this analysis..                                                                                                                |
| 30 | Outcome data        | 15* | Report numbers of outcome events or summary measures over time                                                                                                                                               |
| 31 |                     |     | Number of events, by type, are reported in Table 1. Exposure group: not applicable for this analysis.                                                                                                        |
| 32 | Main results        | 16  | (a) Give unadjusted estimates and, if applicable, confounder-adjusted estimates and their precision (eg, 95% confidence interval). Make clear which confounders were adjusted for and why they were included |
| 33 |                     |     | The study model is reported in Table S1, supplementary material; the analysis is multivariable by nature.                                                                                                    |
| 34 |                     |     | (b) Report category boundaries when continuous variables were categorized                                                                                                                                    |
| 35 |                     |     | Not applicable                                                                                                                                                                                               |
| 36 |                     |     | (c) If relevant, consider translating estimates of relative risk into absolute risk for a meaningful time period                                                                                             |
| 37 |                     |     | Not applicable                                                                                                                                                                                               |
| 38 | Other analyses      | 17  | Report other analyses done—eg analyses of subgroups and interactions, and sensitivity analyses                                                                                                               |
| 39 |                     |     | Not applicable                                                                                                                                                                                               |
| 40 |                     |     |                                                                                                                                                                                                              |
| 41 |                     |     |                                                                                                                                                                                                              |
| 42 |                     |     |                                                                                                                                                                                                              |
| 43 |                     |     |                                                                                                                                                                                                              |
| 44 |                     |     |                                                                                                                                                                                                              |
| 45 |                     |     |                                                                                                                                                                                                              |
| 46 |                     |     |                                                                                                                                                                                                              |
| 47 |                     |     |                                                                                                                                                                                                              |
| 48 |                     |     |                                                                                                                                                                                                              |
| 49 |                     |     |                                                                                                                                                                                                              |
| 50 |                     |     |                                                                                                                                                                                                              |
| 51 |                     |     |                                                                                                                                                                                                              |
| 52 |                     |     |                                                                                                                                                                                                              |
| 53 |                     |     |                                                                                                                                                                                                              |
| 54 |                     |     |                                                                                                                                                                                                              |
| 55 |                     |     |                                                                                                                                                                                                              |
| 56 |                     |     |                                                                                                                                                                                                              |
| 57 |                     |     |                                                                                                                                                                                                              |
| 58 |                     |     |                                                                                                                                                                                                              |
| 59 |                     |     |                                                                                                                                                                                                              |
| 60 |                     |     |                                                                                                                                                                                                              |

| <b>Discussion</b>        |    |                                                                                                                                                                            |                                                              |
|--------------------------|----|----------------------------------------------------------------------------------------------------------------------------------------------------------------------------|--------------------------------------------------------------|
| Key results              | 18 | Summarise key results with reference to study objectives                                                                                                                   | See the first part of the Discussion section, page 9         |
| Limitations              | 19 | Discuss limitations of the study, taking into account sources of potential bias or imprecision. Discuss both direction and magnitude of any potential bias                 | Study limitations are reported and discussed at pages 11-12. |
| Interpretation           | 20 | Give a cautious overall interpretation of results considering objectives, limitations, multiplicity of analyses, results from similar studies, and other relevant evidence | Done                                                         |
| Generalisability         | 21 | Discuss the generalisability (external validity) of the study results                                                                                                      | See pages 11-12                                              |
| <b>Other information</b> |    |                                                                                                                                                                            |                                                              |
| Funding                  | 22 | Give the source of funding and the role of the funders for the present study and, if applicable, for the original study on which the present article is based              | Source of funding is reported at page 12.                    |

\*Give information separately for exposed and unexposed groups.

**Note:** An Explanation and Elaboration article discusses each checklist item and gives methodological background and published examples of transparent reporting. The STROBE checklist is best used in conjunction with this article (freely available on the Web sites of PLoS Medicine at <http://www.plosmedicine.org/>, Annals of Internal Medicine at <http://www.annals.org/>, and Epidemiology at <http://www.epidem.com/>). Information on the STROBE Initiative is available at <http://www.strobe-statement.org>.



**Long-term prediction of major coronary or ischemic stroke event in a low-incidence Southern European population: model development and evaluation of clinical utility**

|                                 |                                                                                                                                                                                                                                                                                                                                                                                                                                                                                                                                                                                                                                                                             |
|---------------------------------|-----------------------------------------------------------------------------------------------------------------------------------------------------------------------------------------------------------------------------------------------------------------------------------------------------------------------------------------------------------------------------------------------------------------------------------------------------------------------------------------------------------------------------------------------------------------------------------------------------------------------------------------------------------------------------|
| Journal:                        | <i>BMJ Open</i>                                                                                                                                                                                                                                                                                                                                                                                                                                                                                                                                                                                                                                                             |
| Manuscript ID:                  | bmjopen-2013-003630.R1                                                                                                                                                                                                                                                                                                                                                                                                                                                                                                                                                                                                                                                      |
| Article Type:                   | Research                                                                                                                                                                                                                                                                                                                                                                                                                                                                                                                                                                                                                                                                    |
| Date Submitted by the Author:   | 30-Sep-2013                                                                                                                                                                                                                                                                                                                                                                                                                                                                                                                                                                                                                                                                 |
| Complete List of Authors:       | Veronesi, Giovanni; Università degli Studi dell'Insubria, Dipartimento di Medicina Clinica e Sperimentale<br>Gianfagna, Francesco; Università degli Studi dell'Insubria, Dipartimento di Medicina Clinica e Sperimentale<br>Chambless, Lloyd; University of North Carolina at Chapel Hill, Biostatistics<br>Giampaoli, Simona; Istituto Superiore di Sanità,<br>Mancia, Guiseppe; Università di MILano-Bicocca, Dipartimento di medicina clinica e prevenzione<br>Cesana, Giancarlo; Università di MILano-Bicocca, Dipartimento di medicina clinica e prevenzione<br>Ferrario, Marco; Università degli Studi dell'Insubria, Dipartimento di Medicina Clinica e Sperimentale |
| <b>Primary Subject Heading</b>: | Epidemiology                                                                                                                                                                                                                                                                                                                                                                                                                                                                                                                                                                                                                                                                |
| Secondary Subject Heading:      | Cardiovascular medicine                                                                                                                                                                                                                                                                                                                                                                                                                                                                                                                                                                                                                                                     |
| Keywords:                       | Cardiac Epidemiology < CARDIOLOGY, Ischaemic heart disease < CARDIOLOGY, PREVENTIVE MEDICINE                                                                                                                                                                                                                                                                                                                                                                                                                                                                                                                                                                                |
|                                 |                                                                                                                                                                                                                                                                                                                                                                                                                                                                                                                                                                                                                                                                             |

SCHOLARONE™  
Manuscripts

1  
2  
3  
4 **Long-term prediction of major coronary or ischemic stroke event in a low-incidence**  
5 **Southern European population: model development and evaluation of clinical utility**  
6  
7

8  
9 **Short Title: Clinical utility of long-term CVD risk prediction in primary prevention**  
10

11  
12 Giovanni Veronesi<sup>1</sup>, Francesco Gianfagna<sup>1</sup>, Lloyd E Chambless<sup>2</sup>, Simona Giampaoli<sup>3</sup>,  
13 Giuseppe Mancia<sup>4</sup>, Giancarlo Cesana<sup>4</sup>, and Marco M Ferrario<sup>1</sup>.  
14

- 15  
16  
17 1. Research Centre in Epidemiology and Preventive Medicine, Department of Clinical and  
18 Experimental Medicine. University of Insubria, Varese, Italy.  
19 2. Department of Biostatistics, University of North Carolina at Chapel Hill, Chapel Hill, NC,  
20 USA  
21 3. Istituto Superiore di Sanità, Roma, Italy  
22 4. Department of Clinical Medicine, Prevention and Health Biotechnology, University of  
23 Milano-Bicocca, Milano, Italy  
24  
25  
26  
27  
28  
29  
30  
31  
32  
33

34 Corresponding author:  
35

36 Dr Giovanni Veronesi  
37 Research Centre in Epidemiology and Preventive Medicine  
38 University of Insubria  
39 Via O Rossi, 9 - Padiglione Rossi, I piano  
40 I-21100 Varese, Italy  
41 Phone +39-0332-270696  
42 Fax +39-0332-278986  
43 [giovanni.veronesi@uninsubria.it](mailto:giovanni.veronesi@uninsubria.it)  
44  
45  
46  
47  
48  
49

50 **Key words:** long-term risk, prediction, cardiovascular disease, clinical utility, primary  
51 prevention  
52

53 **Word count: 2908**  
54  
55  
56  
57  
58  
59  
60

## ABSTRACT

**Objective.** To develop a long-term prediction model of first major cardiovascular event and to assess its clinical utility in a low-incidence European population.

**Setting.** Four independent population-based cohorts enrolled between 1986 and 1993 in Northern Italy.

**Participants and methods.** N=5,247 35-69 years old men and women free of cardiovascular disease at baseline. Absolute 20-year risk of first fatal or non-fatal coronary or ischemic stroke event (MONICA validated) was estimated from gender-specific Cox models.

**Main outcome measures.** Model discrimination (Area Under the ROC-Curve, AUC). “High-risk” subjects were defined based on several threshold values for the 20-year predicted risk. Clinical utility was defined in terms of fraction of missed events (events among those considered at low-risk) and unnecessary treatment (false:true positives ratio). A Net Benefit curve was also provided.

**Results.** Kaplan-Meier 20-year risk was 16.1% in men (315 events) and 6.1% in women (123 events). Model discrimination (AUC=0.737 in men, 0.801 in women) did not change significantly as compared to 10-year prediction time interval. In men, with respect to risk stratification based on the number of risk factors, a 20% predicted risk cut-off would miss less events (36% vs. 50%) and reduce unnecessary treatment (false:true positive ratio: 2.2 vs. 3.0); the Net Benefit was higher over the whole range of threshold values. Similar considerations hold for women.

**Conclusions.** Long-term prediction has good discrimination ability and is clinically useful for risk stratification in primary prevention. A clinical utility analysis is recommended to identify the optimal stratification according to different public health goals.



## ARTICLE SUMMARY

### Article focus

- Primary prevention of cardiovascular disease (CVD) has been recently moved towards the concepts of “lifetime” and “long-term” risk, especially in young subjects and women.
- There is no long-term risk prediction model available for low-incidence Southern European populations; in addition, the evaluation of the clinical benefit of long-term prediction has not been provided so far.
- We aim to develop a 20-year risk score equation in a northern Italian population of men and women considered at low incidence of major cardiovascular events; and to evaluate the clinical utility of the model for risk stratification in primary CVD prevention program.

### Key Messages

- In our population, the 20-year risk model had satisfactory discrimination ability as compared to short-term risk prediction. The importance of long-term prediction for early identification of young subjects and women at increased likelihood of event during their remaining lifespan is confirmed.
- Risk stratification based on the predicted 20-year risk had a better clinical Net Benefit with respect to a stratification based on the number of risk factors, in men and women.
- In both genders, the optimal treatment allocation based on 20-year risk can be determined according to different public health strategies, i.e. either to reduce the fraction of events potentially un-prevented or to avoid un-necessary treatment.

### Strengths and limitations of this study

- Our sample comprises subjects drawn from a representative northern Italian population, with a satisfactory participation rate. We also mention the high-quality of follow-up

1  
2  
3  
4 procedures, including case ascertainment for non-fatal events and a consistent event  
5  
6 validation according to MONICA criteria over the whole follow-up period.  
7

- 8  
9  
10  
11  
12  
13  
14  
15  
16  
17  
18  
19  
20  
21  
22  
23  
24  
25  
26  
27
- 28  
29  
30  
31  
32  
33  
34  
35  
36  
37  
38  
39  
40  
41  
42  
43  
44  
45  
46  
47  
48  
49  
50  
51  
52  
53  
54  
55  
56  
57  
58  
59  
60
- Our 20-year risk prediction model is the first attempt to characterize long-term risk of first coronary or ischemic stroke event in a low-incidence European population. A limitation of our study is the lack of a formal external validation, although we provide a cross-validation analysis. We also remind that our underlying population is characterized by high levels of industrialization and urbanization, with one of the highest average incomes in Italy. Caution is therefore required before generalizing our findings to different contexts.

## INTRODUCTION

Current European and American guidelines for primary prevention of major coronary and stroke events recommend the use of a multivariable risk prediction method to identify high risk subjects [1, 2]. Several risk scores are available in different US [3, 4] and European [5] populations of middle-aged adults, including the Italian one [6], to estimate the risk of first fatal and non-fatal cardiovascular event over a 10 year time interval. Primary prevention however has been recently moved towards the concepts of “lifetime” [7] and “long-term” risks [8], motivated also by the increasing life expectancy in western Countries. To this extent, 10-year risk prediction models are inadequate to distinguish between those at both low short-term and long-term risks, and those at low short-term but at elevated long-term risk due to the presence of non-optimal risk factors levels [9-11]. In the Framingham Study population, an unfavorable risk factor profile led to an increased 30-year risk of first cardiovascular event, independently on the age at the risk factors assessment [10]. In a

1  
2  
3  
4 representative sample of the Italian population, about 80% of individuals classified at low 10-  
5  
6 year risk had increased lifetime risk according to US definition ( $\geq 40\%$ ), potentially leading  
7  
8 to a consistent number of un-prevented events that might have been prevented if lifetime risk  
9  
10 had been considered [11]. This group was largely composed of women and young subjects,  
11  
12 suggesting that long-term prediction models for risk stratification may be even more  
13  
14 beneficial in populations at low incidence of cardiovascular disease [12]. To this extent, the  
15  
16 development of a specific long-term risk prediction should be preferred with respect to re-  
17  
18 calibration of risk models derived in high-incidence countries [13]. However, extending the  
19  
20 range of risk prediction is not a straightforward operation. Although several studies have  
21  
22 shown that a single measurement of risk factor is predictive of future events after 30 plus  
23  
24 years [10, 14], behavioral changes and risk factors modification may affect model  
25  
26 discrimination. High-quality follow-up data, with a consistent event definition and validation  
27  
28 over-time, are also required. Finally, subjects' stratification in risk categories is often based  
29  
30 on arbitrary cut-points of absolute risk [15] which may show no benefit in clinical practice  
31  
32 [16]. The evaluation of the clinical benefit of long-term prediction by means of some  
33  
34 standard measure [17] has not been provided so far and is therefore required [8].  
35  
36  
37 The aim of the present paper is to develop a 20-year risk score equation in a European  
38  
39 population of men and women considered at low incidence of major cardiovascular events. In  
40  
41 addition to standard model calibration and discrimination tools, we evaluate the clinical  
42  
43 utility of the model for risk stratification.  
44  
45  
46  
47

## 48 **METHODS**

### 49 **Study population**

50  
51 The Brianza population comprises residents in 173 municipalities in the area between Milan  
52  
53 and the Swiss border, Northern Italy. The CAMUNI study includes four independent  
54  
55  
56  
57  
58  
59  
60

1  
2  
3  
4 population surveys carried out between 1986 and 1994 as part of either the WHO-MONICA  
5 Project [3 surveys; 18] or the PAMELA study [19]. Participation rates were 70.1%, 67.2%,  
6 and 70.8% for the three MONICA surveys, respectively, and 64% for the PAMELA Study,  
7 with no differences between men and women. Both the baseline screening and the follow-up  
8 for all the surveys were approved by the ethical committee of the Monza Hospital.  
9  
10

### 11 **Baseline assessment of risk factors**

12  
13 Cardiovascular risk factors were collected at baseline strictly adhering to the standardized  
14 procedures and quality standards of the WHO-MONICA Project [20]. Height and weight  
15 were measured on subjects without shoes and wearing light clothing. Trained technicians  
16 collected blood pressure at right arm on subjects in sitting position and at rest, using a  
17 standard mercury sphygmomanometer equipped with two side cuff bladders, for normal and  
18 obese subjects. Systolic and diastolic blood pressure were assessed twice, at 5 minutes apart,  
19 recording the first and fifth phase of the Korotkoff sounds. The study variable for systolic  
20 blood pressure is the average of the two measurements. Venous blood specimens were taken  
21 from the ante-cubital vein on fasting subjects (12 hours or more). Serum total cholesterol,  
22 HDL-cholesterol and blood glucose were determined using the enzymatic methods; HDL-  
23 cholesterol fraction was separated using the Phosphotungstate-Mg<sup>++</sup> method [20]. A  
24 standardized interview was administered to participants by trained interviewers. Information  
25 on the use of anti-hypertensive treatment in the last two weeks was dichotomised as yes/no;  
26 similarly, cigarette smoking habit was dichotomised as current versus past/never smokers.  
27  
28 Diabetes mellitus was defined using self-reported diagnoses, information on insulin and oral  
29 hypoglycaemic treatments and fasting blood glucose exceeding 7 mmol/L (126 mg/dl). The  
30 presence at baseline of a previous history of MI, unstable angina pectoris, cardiac  
31 revascularization or stroke was defined based on self-reported information.  
32  
33  
34  
35  
36  
37  
38  
39  
40  
41  
42  
43  
44  
45  
46  
47  
48  
49  
50  
51  
52  
53  
54  
55  
56  
57  
58  
59  
60

### **Study endpoint and follow-up procedures**

The study endpoint is defined as the occurrence of first major coronary event (myocardial infarction, acute coronary syndrome and coronary revascularization) as well as for first ischemic stroke or carotid endarterectomy, fatal and non-fatal [13]. Data completeness for fatal events was assured through a systematic collection of death certificates provided by local health units; vital status and death certificates were available for 99% of the subjects. Suspected out-of-hospital deaths were investigated through interview of relatives. Suspected hospitalized coronary (discharge code ICD-IX 410 or 411 and ICD-IX CM 36.0-9 for coronary revascularization) and stroke events (ICD-IX 430-432, 434, 436; ICD-IX CM 38.01-39.22 or 39.50-39.52 with at least one 430-438 as discharge code, for carotid endarterectomy) were identified through deterministic and probabilistic record linkages with regional hospital discharge databases, obtaining a satisfactory performance in case finding, as reported [18, 21]. All acute events were investigated and validated according to the MONICA diagnostic criteria [20]; the ischemic subtype for stroke was attributed after review of the available clinical information.

### **Statistical analysis**

Our 20-year risk prediction model is based on gender-specific Cox regression models with age, total cholesterol, HDL-cholesterol, systolic blood pressure, anti-hypertensive treatment, cigarette smoking and diabetes. These predictors are core risk factors included in the CUORE Project [6, 13] as well as in other 10-year risk equations [3, 4]. After a preliminary check on linearity, total- and HDL-cholesterol were included in the model as categorical variables in four standard classes [4, 22]. The interaction between systolic blood pressure and anti-hypertensive treatment was not statistically significant (p-value 0.84 in men and 0.12 in women, respectively). There was no evidence of any cohort effect in the full model, in men

1  
2  
3  
4 (3 df test p-value: 0.2) nor in women (p-value: 0.5). Finally, no violations in the proportional  
5 hazard assumption were observed using a standard test for time-dependent variables.  
6  
7  
8  
9 Model calibration was assessed through the Grønnesby-Bogan goodness-of-fit test [23]. The  
10 Area Under the ROC-curve (AUC), as well as sensitivity and specificity in the top and  
11 bottom predicted risk quintiles, were computed taking censorship into account [24].  
12  
13 Correction for over-optimism and confidence intervals for the AUC were obtained through  
14 1000 bootstrapped samples [25]. To assess the hypothesis of a loss in discrimination ability  
15 due to a longer prediction period, we estimated the 10-year predicted probability of event in  
16 our database, using the same set of risk factors but with shorter follow-up period, i.e. up to  
17 the end of 2002 for all the subjects (number of events: 234 in men, 79 in women). We then  
18 compared the AUC of the two models by looking at their respective bootstrapped confidence  
19 intervals. To assess the clinical utility of the long-term model for risk stratification, we  
20 considered two different public health goals. One is to decrease the number of events  
21 occurring among those considered at “low-risk”. If we assume that a subject classified at  
22 “high risk” will be targeted for prevention (either lifestyle intervention or treatment), any  
23 event occurring outside this category is “not-identified” or “missed” by the prevention  
24 strategy. The second strategy aims instead to reduce un-necessary treatment, by decreasing  
25 the number of non-events among those considered at “high-risk”. Under the two scenarios,  
26 “high-risk” subjects are defined as those with predicted risk above a certain cut-off value.  
27 Clinical utility is defined in terms of *i*) fraction of “missed” events; *ii*) probability of event  
28 among those classified at high risk; and *iii*) false positive/true positive ratio, for several  
29 threshold values in the 20-year predicted risk. We also provide a decision curve analysis  
30 based on the net benefit:  $\text{Net Benefit} = (\text{true positives} - w \cdot \text{false positives})/n$ , where  $n$  is the  
31 sample size and the weight  $w$  represents the ratio between the harm of un-necessary treatment  
32  
33  
34  
35  
36  
37  
38  
39  
40  
41  
42  
43  
44  
45  
46  
47  
48  
49  
50  
51  
52  
53  
54  
55  
56  
57  
58  
59  
60

1  
2  
3  
4 and the harm of missing a case at that given value of predicted risk [17]. All the analyses  
5  
6 were conducted using the SAS software 9.2.  
7

## 8 9 **RESULTS**

10  
11 N=5,426 (2,703 men) subjects were enrolled in the age range 35-69 years. N=205 subjects  
12  
13 (3.8%; n=14 events) had at least one missing data; we considered data imputation (R  
14  
15 *transcan* function, [26]) and excluded only those with missing values in more than 4  
16  
17 covariates of interest (n=6 men and n=3 women). Finally n=120 men and n=45 women with a  
18  
19 positive history of CVD at baseline were also excluded, reducing the sample size to 2,574  
20  
21 men and 2,673 women.  
22  
23

24  
25 Baseline characteristics of the study population, by gender, are shown in **Table 1**. During a  
26  
27 median follow-up time of 15 years (interquartile range: 12-20), we observed 315 first CVD  
28  
29 events in men (233 coronary events) and 123 in women (n=85 coronary events). The Kaplan-  
30  
31 Meier estimate for 20-year risk was 16.1% and 6.1% in men and women, respectively.  
32

### 33 **Model development**

34  
35 The beta-coefficients for the 20-year risk prediction model, as well as the baseline survival  
36  
37 term and the calibration slope [25], are provided in the Supplementary Material (**Table S1**).  
38  
39 All the risk factors were statistically significant, except for anti-hypertensive treatment,  
40  
41 though its point estimate reflected a 30% increase in hazard in both men and women; the  
42  
43 variable was retained in the model for comparability with the short-term CUORE model [6].  
44  
45 There were no significant differences in the set of beta estimates for the 20-year model as  
46  
47 compared to those from the 10-year risk model for the risk factors in the model (data not  
48  
49 shown). The model calibration was satisfactory, in men (Grønnesby-Bogan goodness-of-fit  
50  
51 chi-square 6.7, p-value 0.67) and in women (chi-square 9.6, p-value 0.38); calibration plots  
52  
53 are available as supplementary material (**Figure S1**)  
54  
55  
56  
57  
58  
59  
60

1  
2  
3  
4 We found no statistically significant difference in the overall discrimination ability between  
5 long- and short-term prediction models, in men (0.736 vs. 0.731) and in women (0.801 vs.  
6 0.816; **Table 2**). Only 5% of 20-year events in men occurred among subjects with a predicted  
7 risk below the 20<sup>th</sup> percentile (bottom fifth); the corresponding figure in women is 2%. The  
8 relative risk of event for being above the 80<sup>th</sup> percentile vs. below the 20<sup>th</sup> percentile of 20-  
9 year risk was 9.5 (i.e. 35.1/3.7) in men and 22.4 (i.e. 20.2/0.9) in women. Finally, the value of  
10 the 80<sup>th</sup> percentile for 20-year risk was more than twice as high than the similar percentile for  
11 10-year risk in men (26.8 vs. 10.8) and more than three times as high in women (10.1 vs.  
12 3.0). A similar consideration holds for the 20<sup>th</sup> percentile of risk or the median value.

### 23 **Clinical utility**

24  
25 **Table 3a** and **Table 3b** describe strategies for the identification of high-risk subjects, based  
26 on predicted 20-year risk, in men and women respectively. A cut-off value of 10% twenty  
27 year risk in men would result in a 9% of “missed” events (i.e. events among those with  
28 predicted risk below the cut-point), with a probability of event of 23% and one true positive  
29 for every 3.4 false positive subjects (**Table 3a**). In the second scenario, by choosing the 20%  
30 twenty year risk threshold value, the fraction of missed events was 36%. Note that about 30%  
31 of events occurred for a predicted 20-year risk between 20% and 30%. Finally, using the  
32 number of risk factors to define high risk subjects would result in a higher fraction of missed  
33 events, with no changes in specificity or in the prevalence of subjects considered at high risk.  
34 Among women, a cut-off value of 2% would result in a 5% of missed events, with a  
35 probability of event of 9% and a true positive for every 10.1 false positive women (**Table**  
36 **3b**). In the second scenario, the probability of event among those with absolute risk greater  
37 than 10% was 20.4%, with a true positive for every 3.9 false positive subjects. However, the  
38 fraction of missed events would be 32%; this number can be reduced by lowering the cut-off  
39  
40  
41  
42  
43  
44  
45  
46  
47  
48  
49  
50  
51  
52  
53  
54  
55  
56  
57  
58  
59  
60



1  
2  
3  
4 value to 8%. By considering at high risk those with 2 or more risk factor would result in a  
5  
6 higher fraction of missed events, with no gain in specificity or in the probability of event in  
7  
8 the group. **Figure 1** illustrates the decision curve analysis based on the Net Benefit [17], for  
9  
10 men (left) and women (right). The figure suggests a greater net benefit for the predicted risk  
11  
12 with respect to the number of risk factors over the whole range of values, thus generalizing  
13  
14 the findings from Table 3a and Table 3b.  
15  
16

## 17 **DISCUSSION**

18  
19 In this paper we present the 20-year prediction model of first major coronary or ischemic  
20  
21 stroke event in a Northern Italian population of men and women aged 35 to 69 years at  
22  
23 baseline. To our knowledge, this is the first long-term prediction model in a low-incidence,  
24  
25 European population. The discrimination ability of the long-term model did not significantly  
26  
27 drop with respect to a 10-year risk prediction model derived on the same population. Risk  
28  
29 stratification based on the predicted 20-year risk can be modulated according to different  
30  
31 prevention aims, i.e. either to reduce the fraction of events potentially un-prevented or to  
32  
33 avoid un-necessary treatment. Under both scenarios, the predicted 20-year risk showed an  
34  
35 overall better Net Benefit with respect to a risk stratification based on the number of risk  
36  
37 factors.  
38  
39

40  
41 Our data confirmed previous findings on predictiveness of a single measurement of risk  
42  
43 factors on long-term CVD risk, in the Italian [27] as well as in other populations [10, 14].  
44  
45 Event discrimination for the 20-year risk prediction model did not change significantly from  
46  
47 10-year's, although in women it decreased from 0.814 to 0.801. In the Framingham Offspring  
48  
49 Study updating the baseline measurement of blood pressure and lipids with a later assessment  
50  
51 poorly affected model discrimination and reclassification [28] and cardiometabolic risk  
52  
53 factors clustering has been found to be quite stable over time [29].  
54  
55  
56  
57  
58  
59  
60

1  
2  
3  
4 As in the Framingham population, in our study the long-term predicted risk was more than  
5 simply  $n$ -times the short-term risk prediction [10]. In addition in the age range 35 to 49  
6  
7  
8 years, the long-term predicted risk in subjects with 1 or more non-optimal or elevated risk  
9  
10 factors (defined as in [7]) was 3-times the short-term risk in men, and 4-times in women (see  
11  
12 **Figure S2** in the Supplementary Material). This conveys the importance of long-term  
13  
14 prediction for early identification of young subjects and women at increased likelihood of  
15  
16 event during their remaining lifespan. We observed in our data a modest net reclassification  
17  
18 improvement (computed as in [24]) for the 20-year risk prediction model over the re-  
19  
20 calibrated 10-year risk, in men (1.8%) and in women (4.5%). The net reclassification  
21  
22 increased when we considered subjects with a low 10-year predicted risk but a cluster of 2 or  
23  
24 more risk factors (5.4% and 7.6% in men and women, respectively; data not shown).  
25  
26  
27  
28 Subjects' stratification is often based on arbitrarily-chosen thresholds of predicted risk [15],  
29  
30 which may limit the clinical utility of risk prediction models [16]. We considered two  
31  
32 strategies for the identification of "high-risk" subjects with contrasting goals, either to  
33  
34 decrease the fraction of missed events or to decrease unnecessary treatment. These can be  
35  
36 implemented by choosing threshold values for the predicted risk driven by either sensitivity  
37  
38 or by specificity, respectively. Despite the lowering costs of statin treatment with respect to  
39  
40 the costs of one un-prevented event, the high sensitivity scenario was not cost-effective over  
41  
42 a 10-year period [30]. These two scenarios might be combined to adopt a more complex risk  
43  
44 stratification, as often present in clinical practice [1-2, 12]. For instance, if we consider at  
45  
46 "low-risk" the 36% of men with 20-year absolute risk less than 10%, the fraction of missed  
47  
48 events would be 9%, i.e. 31 first events in 20 years. About 31% of men with absolute risk  
49  
50 between 10% and 20% could be addressed for lifestyle modification or treatment according  
51  
52 to the presence of specific risk factors; this category accounts for about 20% of cases. Finally,  
53  
54  
55  
56  
57  
58  
59  
60

1  
2  
3  
4 the 33% of men with predicted risk above the 20% could be targeted with treatment  
5  
6 intervention; they account for 68% of events, and out of 3.2 treated men, one is a case. A  
7  
8 similar stratification can be provided for women, with different threshold values reflecting  
9  
10 gender-specific underlying risk as for the cardiovascular age assessment [15].  
11  
12

13 Among the study strengths and limitations, our sample comprises subjects drawn from a  
14  
15 representative northern Italian population, with a satisfactory participation rate. The  
16  
17 underlying population is characterized by high levels of industrialization and urbanization,  
18  
19 with one of the highest average incomes in Italy. A major limitation is the lack of an external  
20  
21 validation. External validation for long-term prediction models is in general an issue [10]; we  
22  
23 provide the over-optimism adjusted AUC as well as the calibration slope [25] to allow  
24  
25 applying our equation to different contexts (see Supplementary Material). We also mention a  
26  
27 high-quality of follow-up procedures, including case ascertainment for non-fatal events [21]  
28  
29 and a consistent event validation according to MONICA criteria, resulting in a Standardized  
30  
31 Incidence Rate for the study cohorts above 1 over the whole follow-up period [18]. Finally,  
32  
33 the study endpoint reflects the clinical need to treat the “global” ischemic risk of a given  
34  
35 patient, and not its separate components [3].  
36  
37  
38

39 In conclusions, we provide a model to predict long-term risk of first major ischemic  
40  
41 cardiovascular event in a low-incidence population. Risk stratification based on long-term  
42  
43 risk can be clinically useful, especially for young subjects and women. A clinical utility  
44  
45 analysis is required to identify the optimal stratification, according to different public health  
46  
47 goals.  
48  
49  
50  
51  
52  
53  
54  
55  
56  
57  
58  
59  
60

**Funding**

This work was supported by grants from the Health Administration of Regione Lombardia [grant number 10800/2009], as part of the Osservatorio Epidemiologico Cardiovascolare Regionale Lombardo.

**Competing Interests**

None.

**Contributors**

Conception and design: MMF, GM, GC and GV. All authors interpreted the data and critically reviewed the paper. Statistical analyses: GV, WC. GV drafted the manuscript and is the guarantor. All authors have read and approved the final version of the manuscript.

**Data sharing**

There is no additional data available.

## REFERENCES

1. Perk J, De Backer G, Gohlke H, et al. European Guidelines on cardiovascular disease prevention in clinical practice (version 2012). *Eur Heart J* 2012;33:1635-1701
2. Pearson TA, Blair SN, Daniels SR, et al. AHA Guidelines for Primary Prevention of Cardiovascular Disease and Stroke: 2002 Update : Consensus Panel Guide to Comprehensive Risk Reduction for Adult Patients Without Coronary or Other Atherosclerotic Vascular Diseases. *Circulation* 2002;106:388-391
3. D'Agostino RB, Ramachandran SV, Pencina MJ, et al. General cardiovascular risk profile for use in primary care. The Framingham Heart Study. *Circulation* 2008;117:743-753
4. Chambless LE, Folsom AR, Sharrett AR, et al. Coronary heart disease risk prediction in the Atherosclerosis Risk in Communities (ARIC) study. *J Clin Epidemiol*. 2003;56:880-90
5. Conroy RM, Pyorala K, Fitzgerald AP, et al. Estimation of ten-year risk of fatal Cardiovascular disease in Europe: the SCORE project. *Eur Heart J* 2003;24:987-1003
6. Palmieri L, Panico S, Vanuzzo D, et al. Evaluation of the global cardiovascular absolute risk: the Progetto CUORE individual score. *Ann Ist Super Sanità* 2004;40:393-399.
7. Lloyd-Jones DM, Leip EP, Larson MG, et al. Prediction of lifetime risk for cardiovascular disease by risk factor burden at 50 years of age. *Circulation* 2006;113:791-798
8. Lloyd-Jones DM. Short-term versus long-term risk for coronary artery disease: implications for lipid guidelines. *Curr Opin Lipidol* 2006;17:619-625
9. Daviglius ML, Stamler J, Pirzada A, et al. Favourable cardiovascular risk profile in young women and long-term risk of cardiovascular and all-cause mortality. *JAMA* 2004;292:1588-1592
10. Pencina MJ, D'Agostino RB, Larson MG, et al. Predicting the 30-year risk of cardiovascular disease. The Framingham Heart Study. *Circulation* 2009;119:3078-3084
11. Di Castelnuovo A, Costanzo S, Persichillo M, et al. Distribution of short and lifetime risks for cardiovascular disease in Italians. *Eur J Prev Cardiol* 2011;19:723-730.
12. Mosca L, Benjamin EJ, Berra K, et al. Effectiveness-based guidelines for the prevention of cardiovascular disease in women—2011 update: a guideline from the American Heart Association. *J Am Coll Cardiol* 2011;57:1404-1423

- 1  
2  
3  
4  
5  
6  
7  
8  
9  
10  
11  
12  
13  
14  
15  
16  
17  
18  
19  
20  
21  
22  
23  
24  
25  
26  
27  
28  
29  
30  
31  
32  
33  
34  
35  
36  
37  
38  
39  
40  
41  
42  
43  
44  
45  
46  
47  
48  
49  
50  
51  
52  
53  
54  
55  
56  
57  
58  
59  
60
13. Ferrario MM, Chiodini P, Chambless LE, et al. Prediction of coronary events in a low incidence population. Assessing accuracy of the CUORE Cohort Study prediction equation. *Int J Epidemiol* 2005;34:413-21
  14. Menotti A, Lanti M, Kafatos A, et al. The role of baseline casual blood pressure measurement and of blood pressure changes in middle age in prediction of cardiovascular and all-cause mortality occurring late in life: a cross-cultural comparison among the European cohorts of the Seven Countries Study. *J Hypertens* 2004;22:1683-1690
  15. Grover SA, Lowensteyn I. The challenges and benefits of cardiovascular risk assessment in clinical practice. *Can J Cardiol* 2011;27:481-487
  16. Collins GS, Altman DG. Predicting the 10 year risk of cardiovascular disease in the United Kingdom: independent and external validation of an updated version of QRISK2. *BMJ* 2012;344:e4181.
  17. Vickers AJ, Cronin AM, Elkin EB, et al. Extensions to decision curve analysis, a novel method for evaluating diagnostic tests, prediction models and molecular markers. *Med Decis Making* 2008;8:53
  18. Ferrario M, Sega R, Chatenoud L, et al. Time trends of major coronary risk factors in a northern Italian population (1986-1994). How remarkable are socio-economic differences in an industrialised low CHD incidence country? *Int J Epidemiol* 2001;30:285-291.
  19. Cesana GC, De Vito G, Ferrario M, et al. Ambulatory blood pressure normalcy: The PAMELA Study. *J Hypertension Suppl* 1991;9:17-23.
  20. WWW-publications from the WHO MONICA Project. MONICA Manual. Available at: <http://www.thl.fi/publications/monica/manual/index.htm>.
  21. Fornari C, Madotto F, Demaria M, et al. Record-linkage procedures in epidemiology: an Italian multicentre study. *Epidemiol Prev* 2008;32:79-88.
  22. Wilson PW, D'Agostino RB, Levy D, et al. Prediction of coronary heart disease using risk factors category. *Circulation* 1998;97:1837-47
  23. May S., Hosmer DW. A simplified method of calculating an overall Goodness-of-Fit test for the Cox proportional hazards model. *Lifetime Data Anal* 1998;4:109-120
  24. Chambless LE, Cummiskey CP, and Cui G. Several methods to assess improvement in risk prediction models: extension to survival analysis. *Statist med* 2011;30:22-28
  25. Harrel FE, Lee KL and Marck DB. Tutorial in biostatistics: multivariable prognostic models: issues in developing models, evaluating assumptions and adequacy, and measuring and reducing errors. *Statist med* 1996;15:361-387

1  
2  
3  
4 26. Harrel FE. R reference manual: Package 'Hmisc'. Available at  
5 <http://cran.r-project.org/web/packages/Hmisc/Hmisc.pdf>  
6

7  
8 27. Menotti A, Lanti M. Coronary risk factors predicting early and late coronary events.  
9 *Heart* 2003;89:19-24  
10

11 28. Bell K, Hayen A, McGeechan K, et al. Effects of additional blood pressure  
12 and lipids measurements on the prediction of cardiovascular risk. *Eur J Prev Cardiol*  
13 2012;19:1474-85  
14

15 29. Camhi SM, Katzmarzyk PT. Tracking of cardiometabolic risk factor clustering from  
16 childhood to adulthood. *Int J Pediatr Obes* 2010;5:122-129  
17

18 30. Greving JP, Visseren FLJ, de Wit GA, Algra A. Statin treatment for primary prevention  
19 of vascular disease: whom to treat? Cost-effectiveness analysis. *BMJ* 2011;342:d1672.  
20  
21  
22  
23  
24  
25  
26  
27  
28  
29  
30  
31  
32  
33  
34  
35  
36  
37  
38  
39  
40  
41  
42  
43  
44  
45  
46  
47  
48  
49  
50  
51  
52  
53  
54  
55  
56  
57  
58  
59  
60

## Tables and figures

**Table 1.** Baseline characteristics (mean (SD) or %) of the study population and number of incident events, by gender. Men and women, 35-69 years old, CVD-free at baseline.

|                                           | Men (n=2574) | Women (n=2673) |
|-------------------------------------------|--------------|----------------|
| Age (years)                               | 50.8 (9.1)   | 50.3 (9)       |
| Years of schooling                        | 8.5 (4.2)    | 7.3 (3.4)      |
| Total Cholesterol (mmol/L)                | 5.8 (1.1)    | 5.8 (1.1)      |
| HDL-Cholesterol (mmol/L)                  | 1.3 (0.3)    | 1.6 (0.4)      |
| Body Mass Index (Kg/m <sup>2</sup> )      | 26.2 (3.5)   | 25.6 (4.7)     |
| Systolic Blood Pressure (mmHg)            | 134.8 (19.3) | 131.6 (20.2)   |
| Diastolic Blood Pressure (mmHg)           | 85.9 (10.6)  | 82.8 (10.8)    |
| Anti-hypertensive treatment (%)           | 11.8         | 16.0           |
| Fasting plasma glucose (mmol/L)           | 5.4 (1.3)    | 5.1 (1.2)      |
| Diabetes (%)                              | 6.7          | 4.0            |
| Current smoker (%)                        | 37.1         | 19.6           |
| Incident coronary event (n)               | 233          | 85             |
| Incident ischemic strokes (n)             | 99           | 43             |
| Incident CVD event (n)                    | 315          | 123            |
| 20-year absolute risk of CVD <sup>^</sup> | 16.1         | 6.1            |

<sup>^</sup>: Kaplan-Meier estimate.



**Table 2.** Discrimination ability for the 10-year and the 20-year risk prediction models. Men and women, 35-69 years old, CVD-free at baseline

|                                                               | Men                     |                         | Women                   |                         |
|---------------------------------------------------------------|-------------------------|-------------------------|-------------------------|-------------------------|
|                                                               | 10-year risk            | 20-year risk            | 10-year risk            | 20-year risk            |
| <b>AUC (95% CI)</b>                                           | 0.731<br>(0.702; 0.761) | 0.737<br>(0.713; 0.764) | 0.814<br>(0.779; 0.853) | 0.801<br>(0.771; 0.833) |
| <b>Subjects with predicted risk below the 20th percentile</b> |                         |                         |                         |                         |
| 20th percentile of risk                                       | 2.3                     | 6.3                     | 0.3                     | 1.1                     |
| Fraction of events* (%)                                       | 4.4                     | 5.1                     | 1.4                     | 2.0                     |
| Probability of event in the group^ (%)                        | 0.8                     | 3.7                     | 0.2                     | 0.9                     |
| <b>Subjects with predicted risk above the 80th percentile</b> |                         |                         |                         |                         |
| 80th percentile of risk                                       | 10.8                    | 26.8                    | 3.0                     | 10.1                    |
| Sensitivity* (%)                                              | 49.9                    | 45.6                    | 68.7                    | 62.0                    |
| Specificity (%)                                               | 82.4                    | 85.5                    | 81.1                    | 83.1                    |
| Probability of event in the group^ (%)                        | 19.4                    | 35.1                    | 7.5                     | 20.2                    |

The Area Under the ROC-curve (AUC) was estimated taking censorship into account, and adjusting for over-optimism (n=1000 bootstrap).

\*: Probability of belonging to the group, given that the subject is a case. ^: Kaplan-Meier estimate of the probability of event in the group.

**Table 3a.** Identification of high risk subjects based on the 20-year risk prediction model with respect to the number of risk factors, according to strategies aiming to *i*) reducing the fraction of missed events; and *ii*) reducing un-necessary treatment. Men, 35-69 years old, CVD-free at baseline

|                                                         | Subjects at high risk |       | Fraction of missed events (%) | Specificity (%) | Probability of event* (%) | FP/TP Ratio |
|---------------------------------------------------------|-----------------------|-------|-------------------------------|-----------------|---------------------------|-------------|
|                                                         | n                     | %     |                               |                 |                           |             |
| <b>Strategy a: reduce the fraction of missed events</b> |                       |       |                               |                 |                           |             |
| All subjects                                            | 2574                  | 100.0 | 0.0                           | -               | 16.1                      | 5.2         |
| 1+ Major Risk Factor <sup>#</sup>                       | 1842                  | 71.6  | 13.7                          | 32.5            | 19.5                      | 4.1         |
| 20-year absolute risk > 10%                             | 1645                  | 63.9  | 9.1                           | 41.2            | 22.9                      | 3.4         |
| 20-year absolute risk > 15%                             | 1169                  | 45.4  | 22.1                          | 60.9            | 27.7                      | 2.6         |
| <b>Strategy b: reduce un-necessary treatment</b>        |                       |       |                               |                 |                           |             |
| 2+ Major Risk Factors <sup>#</sup>                      | 828                   | 32.2  | 50.4                          | 73.6            | 24.9                      | 3.0         |
| 20-year absolute risk > 20%                             | 841                   | 32.7  | 35.7                          | 73.7            | 31.7                      | 2.2         |
| 20-year absolute risk > 30%                             | 415                   | 16.1  | 62.6                          | 88.9            | 37.4                      | 1.7         |

“Missed” events are events occurring among subjects not classified at “high risk”, i.e. with 20-year absolute risk (or a number of risk factors) below the cut-off point.

\*: Kaplan-Meier estimate of the probability of event in the group (positive predicted value).

FP = Number of False Positives; TP = Number of True Positives

<sup>#</sup>: total cholesterol > 240 mg/dl; HDL-cholesterol < 40 [men] or < 50 [women] mg/dl; systolic blood pressure > 160 mmHg; smoking; diabetes

**Table 3b.** Identification of high risk subjects based on the 20-year risk prediction model with respect to the number of risk factors, according to strategies aiming to *i*) reducing the fraction of missed events; and *ii*) reducing un-necessary treatment. Women, 35-69 years old, CVD-free at baseline

|                                                         | Subjects at high risk |       | Fraction of missed events (%) | Specificity (%) | Probability of event* (%) | FP/TP Ratio |
|---------------------------------------------------------|-----------------------|-------|-------------------------------|-----------------|---------------------------|-------------|
|                                                         | n                     | %     |                               |                 |                           |             |
| <b>Strategy a: reduce the fraction of missed events</b> |                       |       |                               |                 |                           |             |
| All subjects                                            | 2673                  | 100.0 | 0.0                           | -               | 6.1                       | 15.3        |
| 1+ Major Risk Factor <sup>#</sup>                       | 1654                  | 61.9  | 17.7                          | 40.1            | 8.2                       | 11.3        |
| 20-year absolute risk > 2%                              | 1733                  | 64.8  | 4.5                           | 37.4            | 9.0                       | 10.1        |
| 20-year absolute risk > 5%                              | 1067                  | 39.9  | 14.7                          | 63.2            | 13.1                      | 6.6         |
| <b>Strategy b: reduce un-necessary treatment</b>        |                       |       |                               |                 |                           |             |
| 2+ Major Risk Factors <sup>#</sup>                      | 640                   | 23.9  | 42.3                          | 79.5            | 14.8                      | 5.8         |
| 20-year absolute risk > 8%                              | 698                   | 26.1  | 22.7                          | 77.1            | 18.2                      | 4.5         |
| 20-year absolute risk > 10%                             | 545                   | 20.4  | 32.1                          | 82.7            | 20.4                      | 3.9         |

“Missed” events are events occurring among subjects not classified at “high risk”, i.e. with 20-year absolute risk (or a number of risk factors) below the cut-off point.

\*: Kaplan-Meier estimate of the probability of event in the group (positive predicted value).

FP = Number of False Positives; TP = Number of True Positives

#: total cholesterol > 240 mg/dl; HDL-cholesterol < 40 [men] or < 50 [women] mg/dl; systolic blood pressure > 160 mmHg; smoking; diabetes

1  
2  
3  
4  
5 **Figure 1:** Decision curve for the 20-year risk prediction model in the CAMUNI population, Northern Italy.  
6 Men (left) and women (right), 35 to 69 years old, free of CVD at baseline.  
7  
8  
9  
10  
11  
12  
13  
14  
15  
16  
17  
18  
19  
20  
21  
22  
23  
24  
25  
26  
27  
28  
29  
30  
31  
32  
33  
34  
35  
36  
37  
38  
39  
40  
41  
42  
43  
44  
45  
46  
47  
48  
49

For peer review only

Net Benefit:  $(TP - w * FP) / n$ , where TP = True Positive; FP = False Positive;  $w = (\text{Absolute risk threshold}) / (1 - (\text{Absolute risk threshold}))$ ; n=sample size  
Number of risk factors: total cholesterol >240 mg/dl; HDL-cholesterol <40 [men] or <50 [women] mg/dl; systolic blood pressure >160 mmHg; smoking; diabetes

1  
2  
3  
4  
5  
6  
7  
8 **Long-term prediction of major coronary or ischemic stroke event in a low-incidence**

9 **Southern European population: model development and evaluation of clinical utility**

Comment [g1]: Added. See reviewer 1, comment #1

10  
11 **Short Title: Clinical utility of long-term CVD risk prediction in primary prevention**

12  
13  
14 Giovanni Veronesi<sup>1</sup>, Francesco Gianfagna<sup>1</sup>, Lloyd E Chambless<sup>2</sup>, Simona Giampaoli<sup>3</sup>,  
15 Giuseppe Mancia<sup>4</sup>, Giancarlo Cesana<sup>4</sup>, and Marco M Ferrario<sup>1</sup>.

16  
17  
18 1. Research Centre in Epidemiology and Preventive Medicine, Department of Clinical and  
19 Experimental Medicine. University of Insubria, Varese, Italy.

20 2. Department of Biostatistics, University of North Carolina at Chapel Hill, Chapel Hill, NC,  
21 USA

22 3. Istituto Superiore di Sanità, Roma, Italy

23 4. Department of Clinical Medicine, Prevention and Health Biotechnology, University of  
24 Milano-Bicocca, Milano, Italy

25  
26  
27  
28  
29  
30  
31  
32  
33  
34 Corresponding author:

35 Dr Giovanni Veronesi  
36 Research Centre in Epidemiology and Preventive Medicine  
37 University of Insubria  
38 Via O Rossi, 9 - Padiglione Rossi, I piano  
39 I-21100 Varese, Italy  
40 Phone +39-0332-270696  
41 Fax +39-0332-278986  
42 [giovanni.veronesi@uninsubria.it](mailto:giovanni.veronesi@uninsubria.it)  
43  
44  
45  
46

47 **Key words:** long-term risk, prediction, cardiovascular disease, clinical utility, primary  
48 prevention

49  
50 **Word count: 2908**  
51  
52  
53  
54  
55  
56  
57  
58  
59  
60

## ABSTRACT

**Objective.** To develop a long-term prediction model of first major cardiovascular event and to assess its clinical utility in a low-incidence European population.

**Setting.** Four independent population-based cohorts enrolled between 1986 and 1993 in Northern Italy.

**Participants and methods.** N=5,247 35-69 years old men and women free of cardiovascular disease at baseline. Absolute 20-year risk of first fatal or non-fatal coronary or ischemic stroke event (MONICA validated) was estimated from gender-specific Cox models.

**Main outcome measures.** Model discrimination (Area Under the ROC-Curve, AUC). “High-risk” subjects were defined based on several threshold values for the 20-year predicted risk. Clinical utility was defined in terms of fraction of missed events (events among those considered at low-risk) and unnecessary treatment (false:true positives ratio). A Net Benefit curve was also provided.

**Results.** Kaplan-Meier 20-year risk was 16.1% in men (315 events) and 6.1% in women (123 events). Model discrimination (AUC=0.737 in men, 0.801 in women) did not change significantly as compared to 10-year prediction time interval. In men, with respect to risk stratification based on the number of risk factors, a 20% predicted risk cut-off would miss less events (36% vs. 50%) and reduce unnecessary treatment (false:true positive ratio: 2.2 vs. 3.0); the Net Benefit was higher over the whole range of threshold values. Similar considerations hold for women.

**Conclusions.** Long-term prediction has good discrimination ability and is clinically useful for risk stratification in primary prevention. A clinical utility analysis is recommended to identify the optimal stratification according to different public health goals.

## INTRODUCTION

Current European and American guidelines for primary prevention of major coronary and stroke events recommend the use of a multivariable risk prediction method to identify high risk subjects [1, 2]. Several risk scores are available in different US [3, 4] and European [5] populations of middle-aged adults, including the Italian one [6], to estimate the risk of first fatal and non-fatal cardiovascular event over a 10 year time interval. Primary prevention however has been recently moved towards the concepts of “lifetime” [7] and “long-term” risks [8], motivated also by the increasing life expectancy in western Countries. To this extent, 10-year risk prediction models are inadequate to distinguish between those at both low short-term and long-term risks, and those at low short-term but at elevated long-term risk due to the presence of non-optimal risk factors levels [9-11]. In the Framingham Study population, an unfavorable risk factor profile led to an increased 30-year risk of first cardiovascular event, independently on the age at the risk factors assessment [10]. In a representative sample of the Italian population, about 80% of individuals classified at low 10-year risk had increased lifetime risk according to US definition ( $\geq 40\%$ ), potentially leading to a consistent number of un-prevented events that might have been prevented if lifetime risk had been considered [11]. This group was largely composed of women and young subjects, suggesting that long-term prediction models for risk stratification may be even more beneficial in populations at low incidence of cardiovascular disease [12]. To this extent, the development of a specific long-term risk prediction should be preferred with respect to re-calibration of risk models derived in high-incidence countries [13]. However, extending the range of risk prediction is not a straightforward operation. Although several studies have shown that a single measurement of risk factor is predictive of future events after 30 plus years [10, 14], behavioral changes and risk factors modification may affect model

1  
2  
3  
4  
5  
6  
7  
8 discrimination. High-quality follow-up data, with a consistent event definition and validation  
9 over-time, are also required. Finally, subjects' stratification in risk categories is often based  
10 on arbitrary cut-points of absolute risk [15] which may show no benefit in clinical practice  
11 [16]. The evaluation of the clinical benefit of long-term prediction by means of some  
12 standard measure [17] has not been provided so far and is therefore required [8].  
13  
14

15  
16  
17 The aim of the present paper is to develop a 20-year risk score equation in a European  
18 population of men and women considered at low incidence of major cardiovascular events. In  
19 addition to standard model calibration and discrimination tools, we evaluate the clinical  
20 utility of the model for risk stratification.  
21  
22  
23  
24

## 25 **METHODS**

### 26 **Study population**

27  
28 The Brianza population comprises residents in 173 municipalities in the area between Milan  
29 and the Swiss border, Northern Italy. The CAMUNI study includes four independent  
30 population surveys carried out between 1986 and 1994 as part of either the WHO-MONICA  
31 Project [3 surveys; 18] or the PAMELA study [19]. Participation rates were 70.1%, 67.2%,  
32 and 70.8% for the three MONICA surveys, respectively, and 64% for the PAMELA Study,  
33 with no differences between men and women. Both the baseline screening and the follow-up  
34 for all the surveys were approved by the ethical committee of the Monza Hospital.  
35  
36  
37  
38  
39  
40  
41

### 42 **Baseline assessment of risk factors**

43  
44 Cardiovascular risk factors were collected at baseline strictly adhering to the standardized  
45 procedures and quality standards of the WHO-MONICA Project [20]. Height and weight  
46 were measured on subjects without shoes and wearing light clothing. Trained technicians  
47 collected blood pressure at right arm on subjects in sitting position and at rest, using a  
48 standard mercury sphygmomanometer equipped with two side cuff bladders, for normal and  
49  
50  
51  
52  
53  
54  
55  
56  
57  
58  
59  
60



1  
2  
3  
4  
5  
6  
7  
8 obese subjects. Systolic and diastolic blood pressure were assessed twice, at 5 minutes apart,  
9 recording the first and fifth phase of the Korotkoff sounds. The study variable for systolic  
10 blood pressure is the average of the two measurements. Venous blood specimens were taken  
11 from the ante-cubital vein on fasting subjects (12 hours or more). Serum total cholesterol,  
12 HDL-cholesterol and blood glucose were determined using the enzymatic methods; HDL-  
13 cholesterol fraction was separated using the Phosphotungstate-Mg<sup>++</sup> method [20]. A  
14 standardized interview was administered to participants by trained interviewers. Information  
15 on the use of anti-hypertensive treatment in the last two weeks was dichotomised as yes/no;  
16 similarly, cigarette smoking habit was dichotomised as current versus past/never smokers.  
17 Diabetes mellitus was defined using self-reported diagnoses, information on insulin and oral  
18 hypoglycaemic treatments and fasting blood glucose exceeding 7 mmol/L (126 mg/dl). The  
19 presence at baseline of a previous history of MI, unstable angina pectoris, cardiac  
20 revascularization or stroke was defined based on self-reported information.  
21  
22  
23  
24  
25  
26  
27  
28  
29  
30  
31

### 32 **Study endpoint and follow-up procedures**

33  
34 The study endpoint is defined as the occurrence of first major coronary event (myocardial  
35 infarction, acute coronary syndrome and coronary revascularization) as well as for first  
36 ischemic stroke or carotid endarterectomy, fatal and non-fatal [13]. Data completeness for  
37 fatal events was assured through a systematic collection of death certificates provided by  
38 local health units; vital status and death certificates were available for 99% of the subjects.  
39 Suspected out-of-hospital deaths were investigated through interview of relatives. Suspected  
40 hospitalized coronary (discharge code ICD-IX 410 or 411 and ICD-IX CM 36.0-9 for  
41 coronary revascularization) and stroke events (ICD-IX 430-432, 434, 436; ICD-IX CM  
42 38.01-39.22 or 39.50-39.52 with at least one 430-438 as discharge code, for carotid  
43 endarterectomy) were identified through deterministic and probabilistic record linkages with  
44  
45  
46  
47  
48  
49  
50  
51  
52  
53  
54  
55  
56  
57  
58  
59  
60

1  
2  
3  
4  
5  
6  
7  
8 regional hospital discharge databases, obtaining a satisfactory performance in case finding, as  
9 reported [18, 21]. All acute events were investigated and validated according to the MONICA  
10 diagnostic criteria [20]; the ischemic subtype for stroke was attributed after review of the  
11 available clinical information.  
12

### 13 14 15 **Statistical analysis**

16  
17 The CUORE Project 10 year risk equation for the Italian population [6, 18] constituted the  
18 base for the development of the 20 year risk prediction model. ~~Our 20-year risk prediction~~

Comment [g2]: Deleted; reviewer 2, comment #2

19  
20 model is based on ~~We considered~~ gender-specific Cox regression models with age, total  
21 cholesterol, HDL-cholesterol, systolic blood pressure, anti-hypertensive treatment, cigarette  
22 smoking and diabetes. These predictors are core risk factors included in the CUORE Project

23  
24  
25 [6, 13] as well as in other 10-year risk equations [3, 4]. After a preliminary check on linearity,

Comment [g3]: Added; reviewer 2, comment #2

26  
27  
28 total- and HDL-cholesterol were included in the model as categorical variables in four  
29 standard classes [4, 22]. The interaction between systolic blood pressure and anti-

30  
31 hypertensive treatment was not statistically significant (p-value 0.84 in men and 0.12 in

32  
33 women, respectively). There was no evidence of any cohort effect in the full model, in men

34  
35 (3 df test p-value: 0.2) nor in women (p-value: 0.5). Finally, no violations in the proportional

Comment [g4]: Added; reviewer 1, comment #2

36  
37 hazard assumption were observed using a standard test for time-dependent variables.

38  
39 Model calibration was assessed through the Grønnesby-Bogan goodness-of-fit test [23]. The

40  
41 Area Under the ROC-curve (AUC), as well as sensitivity and specificity in the top and

42  
43 bottom predicted risk quintiles, were computed taking censorship into account [24].

44  
45 Correction for over-optimism and confidence intervals for the AUC were obtained through

46  
47 1000 bootstrapped samples [25]. To assess the hypothesis of a loss in discrimination ability

48  
49 due to a longer prediction period, we estimated the 10-year predicted probability of event in

50  
51 our database, using the same set of risk factors but with shorter follow-up period, i.e. up to

1  
2  
3  
4  
5  
6  
7  
8 the end of 2002 for all the subjects (number of events: 234 in men, 79 in women). We then  
9  
10 compared the AUC of both models, by considering bootstrapped confidence intervals for the  
11  
12 difference in the betas. We then compared the AUC of the two models by looking at their  
13  
14 respective bootstrapped confidence intervals.

Comment [G5]: Added; reviewer 1, comment #10

Comment [G6]: Rewording of this sentence below; reviewer 1, comment #9

15  
16 To assess the clinical utility of the long-term model for risk stratification, we considered two  
17  
18 different public health goals. One is to decrease the number of events occurring among those  
19  
20 considered at “low-risk”. If we assume that a subject classified at “high risk” will be targeted  
21  
22 for prevention (either lifestyle intervention or treatment), any event occurring outside this  
23  
24 category is “not-identified” or “missed” by the prevention strategy. The second strategy aims  
25  
26 instead to reduce un-necessary treatment, by decreasing the number of non-events among  
27  
28 those considered at “high-risk”. Under the two scenarios, “high-risk” subjects are defined as  
29  
30 those with predicted risk above a certain cut-off value. Clinical utility is defined in terms of  
31  
32 *i)* fraction of “missed” events; *ii)* probability of event among those classified at high risk; and  
33  
34 *iii)* false positive/true positive ratio, for several threshold values in the 20-year predicted risk.  
35  
36 We also provide a decision curve analysis based on the net benefit: Net Benefit = (true  
37  
38 positives - w\*false positives)/n, where n is the sample size and the weight w represents the  
39  
40 ratio between the harm of un-necessary treatment and the harm of missing a case at that given  
41  
42 value of predicted risk [17]. All the analyses were conducted using the SAS software 9.2.

## 43 RESULTS

44 N=5,426 (2,703 men) subjects were enrolled in the age range 35-69 years. N=205 subjects  
45  
46 (3.8%; n=14 events) had at least one missing data; we considered data imputation (R  
47  
48 *transcan* function, [26]) and excluded only those with missing values in more than 4  
49  
50 covariates of interest (n=6 men and n=3 women). Finally n=120 men and n=45 women with a  
51  
52  
53  
54  
55  
56  
57  
58  
59  
60

1  
2  
3  
4  
5  
6  
7  
8 positive history of CVD at baseline were also excluded, reducing the sample size to 2,574  
9 men and 2,673 women.

10  
11 Baseline characteristics of the study population, by gender, are shown in **Table 1**. During a  
12 median follow-up time of 15 years (interquartile range: 12-20), we observed 315 first CVD  
13 events in men (233 coronary events) and 123 in women (n=85 coronary events). The Kaplan-  
14 Meier estimate for 20-year risk was 16.1% and 6.1% in men and women, respectively.  
15  
16  
17  
18

### 19 **Model development**

20  
21 The beta-coefficients for the 20-year risk prediction model, as well as the baseline survival  
22 term and the calibration slope [25], are provided in the Supplementary Material (**Table S1**).  
23

24 All the risk factors were statistically significant, except for anti-hypertensive treatment,  
25 though its point estimate reflected a 30% increase in hazard in both men and women; the  
26 variable was retained in the model for comparability with the short-term CUORE model [6].  
27  
28  
29

30 There were no significant differences in the set of beta estimates for the 20-year model as  
31 compared to those from the 10-year risk model for the risk factors in the model (data not  
32 shown). The model calibration was satisfactory, in men (Grønnesby-Bogan goodness-of-fit  
33 chi-square 6.7, p-value 0.67) and in women (chi-square 9.6, p-value 0.38); [calibration plots](#)  
34  
35  
36

37  
38  
39 [are available as supplementary material \(Figure S1\)](#);

**Comment [G7]:** Added; reviewer 1, comment #8

40  
41 We found no statistically significant difference in the overall discrimination ability between  
42 long- and short-term prediction models, in men (0.736 vs. 0.731) and in women (0.801 vs.  
43 0.816; **Table 2**). Only 5% of 20-year events in men occurred among subjects with a predicted  
44 risk below the 20<sup>th</sup> percentile (bottom [quintile fifth](#)); the corresponding figure in women is  
45 2%. The relative risk of event for being above the 80<sup>th</sup> percentile vs. below the 20<sup>th</sup> percentile  
46 of 20-year risk was 9.5 (i.e. 35.1/3.7) in men and 22.4 (i.e. 20.2/0.9) in women. Finally, the  
47 value of the 80<sup>th</sup> percentile for 20-year risk was more than twice as high than the similar  
48  
49  
50  
51  
52  
53  
54  
55  
56  
57  
58  
59  
60

**Comment [g8]:** Reviewer 1, comment #7

1  
2  
3  
4  
5  
6  
7  
8 percentile for 10-year risk in men (26.8 vs. 10.8) and more than three times as high in women  
9  
10 (10.1 vs. 3.0). A similar consideration holds for the 20<sup>th</sup> percentile of risk or the median  
11  
12 value.

### 13 **Clinical utility**

14  
15 **Table 3a** and **Table 3b** describe strategies for the identification of high-risk subjects, based  
16  
17 on predicted 20-year risk, in men and women respectively. A cut-off value of 10% twenty  
18  
19 year risk in men would result in a 9% of “missed” events (i.e. events among those with  
20  
21 predicted risk below the cut-point), with a probability of event of 23% and one true positive  
22  
23 for every 3.4 false positive subjects (**Table 3a**). In the second scenario, by choosing the 20%  
24  
25 twenty year risk threshold value, the fraction of missed events was 36%. Note that about 30%  
26  
27 of events occurred for a predicted 20-year risk between 20% and 30%. Finally, using the  
28  
29 number of risk factors to define high risk subjects would result in a higher fraction of missed  
30  
31 events, with no changes in specificity or in the prevalence of subjects considered at high risk.  
32  
33 Among women, a cut-off value of 2% would result in a 5% of missed events, with a  
34  
35 probability of event of 9% and a true positive for every 10.1 false positive women (**Table**  
36  
37 **3b**). In the second scenario, the probability of event among those with absolute risk greater  
38  
39 than 10% was 20.4%, with a true positive for every 3.9 false positive subjects. However, the  
40  
41 fraction of missed events would be 32%; this number can be reduced by lowering the cut-off  
42  
43 value to 8%. By considering at high risk those with 2 or more risk factor would result in a  
44  
45 higher fraction of missed events, with no gain in specificity or in the probability of event in  
46  
47 the group. **Figure 1** illustrates the decision curve analysis based on the Net Benefit [17], for  
48  
49 men (left) and women (right). The figure suggests a greater net benefit for the predicted risk  
50  
51 with respect to the number of risk factors over the whole range of values, thus generalizing  
52  
53 the findings from Table 3a and Table 3b.  
54  
55  
56  
57  
58  
59  
60

## DISCUSSION

In this paper we present the 20-year prediction model of first major coronary or ischemic stroke event in a Northern Italian population of men and women aged 35 to 69 years at baseline. To our knowledge, this is the first long-term prediction model in a low-incidence, European population. The discrimination ability of the long-term model did not significantly drop with respect to a 10-year risk prediction model derived on the same population. Risk stratification based on the predicted 20-year risk can be modulated according to different prevention aims, i.e. either to reduce the fraction of events potentially un-prevented or to avoid un-necessary treatment. Under both scenarios, the predicted 20-year risk showed an overall better Net Benefit with respect to a risk stratification based on the number of risk factors.

Our data confirmed previous findings on predictiveness of a single measurement of risk factors on long-term CVD risk, in the Italian [27] as well as in other populations [10, 14]. Event discrimination for the 20-year risk prediction model did not change significantly from 10-year's, although in women it decreased from 0.814 to 0.801. In the Framingham Offspring Study updating the baseline measurement of blood pressure and lipids with a later assessment poorly affected model discrimination and reclassification [28] and cardiometabolic risk factors clustering has been found to be quite stable over time [29].

As in the Framingham population, in our study the long-term predicted risk was more than simply  $n$ -times the short-term risk prediction [10]. In addition in the age range 35 to 49 years, the long-term predicted risk in subjects with 1 or more non-optimal or elevated risk factors (defined as in [7]) was 3-times the short-term risk in men, and 4-times in women (see

Figure S12 in the Supplementary Material). This conveys the importance of long-term prediction for early identification of young subjects and women at increased likelihood of

**Comment [g9]:** Calibration plot has been added as Figure S1, and this becomes Figure S2

1  
2  
3  
4  
5  
6  
7  
8 event during their remaining lifespan. We observed in our data a modest net reclassification  
9  
10 improvement (computed as in [24]) for the 20-year risk prediction model over the re-  
11  
12 calibrated 10-year risk, in men (1.8%) and in women (4.5%). The net reclassification  
13  
14 increased when we considered subjects with a low 10-year predicted risk but a cluster of 2 or  
15  
16 more risk factors (5.4% and 7.6% in men and women, respectively; data not shown).  
17  
18 Subjects' stratification is often based on arbitrarily-chosen thresholds of predicted risk [15],  
19  
20 which may limit the clinical utility of risk prediction models [16]. We considered two  
21  
22 strategies for the identification of "high-risk" subjects with contrasting goals, either to  
23  
24 decrease the fraction of missed events or to decrease un-necessary treatment. These can be  
25  
26 implemented by choosing threshold values for the predicted risk driven by either sensitivity  
27  
28 or by specificity, respectively. Despite the lowering costs of statin treatment with respect to  
29  
30 the costs of one un-prevented event, the high sensitivity scenario was not cost-effective over  
31  
32 a 10-year period [30]. might not be cost-effective [30]. These two scenarios might be  
33  
34 combined to adopt a more complex risk stratification, as often present in clinical practice [1-  
35  
36 2, 12]. For instance, if we consider at "low-risk" the 36% of men with 20-year absolute risk  
37  
38 less than 10%, the fraction of missed events would be 9%, i.e. 31 first events in 20 years.  
39  
40 About 31% of men with absolute risk between 10% and 20% could be addressed for lifestyle  
41  
42 modification or treatment according to the presence of specific risk factors; this category  
43  
44 accounts for about 20% of cases. Finally, the 33% of men with predicted risk above the 20%  
45  
46 could be targeted with treatment intervention; they account for 68% of events, and out of 3.2  
47  
48 treated men, one is a case. A similar stratification can be provided for women, with different  
49  
50 threshold values reflecting gender-specific underlying risk as for the cardiovascular age  
51  
52 assessment [15].  
53  
54  
55  
56  
57  
58  
59  
60

Comment [G10]: Modified. See reviewer 2, comment #3

1  
2  
3  
4  
5  
6  
7  
8 Among the study strengths and limitations, our sample comprises subjects drawn from a  
9 representative northern Italian population, with a satisfactory participation rate. The  
10 underlying population is characterized by high levels of industrialization and urbanization,  
11 with one of the highest average incomes in Italy. A major limitation is the lack of an external  
12 validation. External validation for long-term prediction models is in general an issue [10]; we  
13 provide the over-optimism adjusted AUC as well as the , although we provide As  
14 Supplementary Material we provide the baseline survival term as well as a calibration slope  
15 [25] to allow applying our equation to different contexts (see Supplementary Material).  
16 However, a validation study in a different population might be desirable to investigate the  
17 generalizability of our findings. We also mention a high-quality of follow-up procedures,  
18 including case ascertainment for non-fatal events [21] and a consistent event validation  
19 according to MONICA criteria, resulting in a Standardized Incidence Rate for the study  
20 cohorts above 1 over the whole follow-up period [18]. Finally, the study endpoint reflects the  
21 clinical need to treat the “global” ischemic risk of a given patient, and not its separate  
22 components [3].

23  
24  
25  
26  
27  
28  
29  
30  
31  
32  
33  
34  
35  
36  
37  
38  
39  
40  
41  
42  
43  
44  
45  
46  
47  
48  
49  
50  
51  
52  
53  
54  
55  
56  
57  
58  
59  
60

In conclusions, we provide a model to predict long-term risk of first major ischemic cardiovascular event in a low-incidence population. Risk stratification based on long-term risk can be clinically useful, especially for young subjects and women. A clinical utility analysis is required to identify the optimal stratification, according to different public health goals.

## Funding

Comment [G11]: Modified; see reviewer 2, comment #5

Comment [G12]: Deleted; see reviewer #2, comment #5



1  
2  
3  
4  
5  
6  
7  
8 This work was supported by grants from the Health Administration of Regione Lombardia  
9 [grant number 10800/2009], as part of the Osservatorio Epidemiologico Cardiovascolare  
10 Regionale Lombardo.  
11

#### 12 **Competing Interests**

13  
14  
15 None.

#### 16 **Contributors**

17  
18 Conception and design: MMF, GM, GC and GV. All authors interpreted the data and  
19 critically reviewed the paper. Statistical analyses: GV, WC. GV drafted the manuscript and is  
20 the guarantor. All authors have read and approved the final version of the manuscript.  
21  
22  
23

#### 24 **Data sharing**

25  
26 There is no additional data available  
27

#### 28 **ARTICLE SUMMARY**

##### 29 **Article focus**

- 30  
31  
32
- 33 ▪ Primary prevention of cardiovascular disease (CVD) has been recently moved towards  
34 the concepts of “lifetime” and “long-term” risk, especially in young subjects and women.
  - 35  
36 ▪ There is no long-term risk prediction model available for low-incidence Southern  
37 European populations; in addition, the evaluation of the clinical benefit of long-term  
38 prediction has not been provided so far.
  - 39  
40 ▪ We aim to develop a 20-year risk score equation in a northern Italian population of men  
41 and women considered at low incidence of major cardiovascular events; and to evaluate  
42 the clinical utility of the model for risk stratification in primary CVD prevention program.  
43  
44  
45  
46  
47

##### 48 **Key Messages**

- 49  
50 ▪ In our population, the 20-year risk model had satisfactory discrimination ability as  
51 compared to short-term risk prediction. The importance of long-term prediction for early  
52  
53  
54  
55

1  
2  
3  
4  
5  
6  
7  
8 identification of young subjects and women at increased likelihood of event during their  
9 remaining lifespan is confirmed.

- 11 ■ Risk stratification based on the predicted 20-year risk had a better clinical Net Benefit  
12 with respect to a stratification based on the number of risk factors, in men and women.
- 13  
14 ■ In both genders, the optimal treatment allocation based on 20-year risk can be determined  
15 according to different public health strategies, i.e. either to reduce the fraction of events  
16 potentially un-prevented or to avoid un-necessary treatment.  
17  
18  
19

### 20 21 **Strengths and limitations of this study**

- 22 ■ Our sample comprises subjects drawn from a representative northern Italian population,  
23 with a satisfactory participation rate. We also mention the high-quality of follow-up  
24 procedures, including case ascertainment for non-fatal events and a consistent event  
25 validation according to MONICA criteria over the whole follow-up period.  
26  
27  
28  
29  
30  
31 ■ Our 20-year risk prediction model is the first attempt to characterize long-term risk of  
32 first coronary or ischemic stroke event in a low-incidence European population. [A](#)  
33 [limitation of our study is the lack of a formal external validation, although we provide a](#)  
34 [cross-validation analysis. ~~To allow applying our equation to different populations, as~~](#)  
35 [Supplementary Material we provide the baseline survival term as well as the calibration](#)  
36 [slope. ~~However, an external validation study might be desirable.~~](#) We also remind that our  
37 underlying population is characterized by high levels of industrialization and  
38 urbanization, with one of the highest average incomes in Italy. Caution is therefore  
39 required before generalizing our findings to different contexts.  
40  
41  
42  
43  
44  
45  
46  
47  
48  
49  
50  
51  
52  
53  
54  
55  
56  
57  
58  
59  
60

**Comment [G13]:** Added; see reviewer 2, comment #5

**Comment [G14]:** Deleted; see reviewer 2, comment #5

## REFERENCES

1. Perk J, De Backer G, Gohlke H, Graham I, Reiner Z, Verschuren WM, et al. European Guidelines on cardiovascular disease prevention in clinical practice (version 2012). *Eur Heart J* 2012;33:1635-1701
2. Pearson TA, Blair SN, Daniels SR, et al. AHA Guidelines for Primary Prevention of Cardiovascular Disease and Stroke: 2002 Update : Consensus Panel Guide to Comprehensive Risk Reduction for Adult Patients Without Coronary or Other Atherosclerotic Vascular Diseases. *Circulation* 2002;106:388-391
3. D'Agostino RB, Ramachandran SV, Pencina MJ, Wolf PA, Cobain M, Massaro JM, Kannel WB. General cardiovascular risk profile for use in primary care. The Framingham Heart Study. *Circulation* 2008;117:743-753
4. Chambless LE, Folsom AR, Sharrett AR, Sorlie P, Couper D, Szklo M, Nieto FJ. Coronary heart disease risk prediction in the Atherosclerosis Risk in Communities (ARIC) study. *J Clin Epidemiol.* 2003;56:880-90
5. Conroy RM, Pyorala K, Fitzgerald AP, et al. Estimation of ten-year risk of fatal Cardiovascular disease in Europe: the SCORE project. *Eur Heart J* 2003;24:987-1003
6. Palmieri L, Panico S, Vanuzzo D, Ferrario M, Pilotto L, Sega R, Cesana G, Giampaoli S per il gruppo di ricerca del Progetto CUORE. Evaluation of the global cardiovascular absolute risk: the Progetto CUORE individual score. *Ann Ist Super Sanità* 2004;40:393-399.
7. Lloyd-Jones DM, Leip EP, Larson MG, D'Agostino RB, Beiser A, Wilson PWF, Wolf P, Levy D. Prediction of lifetime risk for cardiovascular disease by risk factor burden at 50 years of age. *Circulation* 2006;113:791-798
8. Lloyd-Jones DM. Short-term versus long-term risk for coronary artery disease: implications for lipid guidelines. *Curr Opin Lipidol* 2006;17:619-625
9. Daviglius ML, Stamler J, Pirzada A, Yan LL, Garside DB, Liu K, Wang R, Dyer AR, Lloyd-Jones DM, Greenland P. Favourable cardiovascular risk profile in young women and long-term risk of cardiovascular and all-cause mortality. *JAMA* 2004;292:1588-1592
10. Pencina MJ, D'Agostino RB, Larson MG, Massaro JM, Vasan RS. Predicting the 30-year risk of cardiovascular disease. The Framingham Heart Study. *Circulation* 2009;119:3078-3084
11. Di Castelnuovo A, Costanzo S, Persichillo M, Olivieri M, de Curtis A, Zito F, Donati MB, de Gaetano G, Iacoviello L. Distribution of short and lifetime risks for cardiovascular disease in Italians. *Eur J Prev Cardiol* 2011;19:723-730.

- 1  
2  
3  
4  
5  
6  
7  
8  
9 12. Mosca L, Benjamin EJ, Berra K, Bezanson JL, Dolor RJ, et al. Effectiveness-  
10 based guidelines for the prevention of cardiovascular disease in women—2011 update: a  
11 guideline from the American Heart Association. *J Am Coll Cardiol* 2011;57:1404–1423  
12  
13 13. Ferrario MM, Chiodini P, Chambless LE, Cesana G, Vanuzzo D, Panico S, Sega R,  
14 Pilotto L, Palmieri L and Giampaoli S for the CUORE Project Research Group. Prediction of  
15 coronary events in a low incidence population. Assessing accuracy of the CUORE Cohort  
16 Study prediction equation. *Int J Epidemiol* 2005;34:413-21  
17  
18 14. Menotti A, Lanti M, Kafatos A, Nissinen A, Dontas A, Nedeljkovic S, Kromhout D, for  
19 the Seven Countries Study. The role of baseline casual blood pressure measurement and of  
20 blood pressure changes in middle age in prediction of cardiovascular and all-cause mortality  
21 occurring late in life: a cross-cultural comparison among the European cohorts of the Seven  
22 Countries Study. *J Hypertens* 2004;22:1683-1690  
23  
24 15. Grover SA, Lowensteyn I. The challenges and benefits of cardiovascular risk assessment  
25 in clinical practice. *Can J Cardiol* 2011;27:481-487  
26  
27 16. Collins GS, Altman DG. Predicting the 10 year risk of cardiovascular disease in the  
28 United Kingdom: independent and external validation of an updated version of QRISK2.  
29 *BMJ* 2012;344:e4181.  
30  
31 17. Vickers AJ, Cronin AM, Elkin EB, Gonen M. Extensions to decision curve analysis, a  
32 novel method for evaluating diagnostic tests, prediction models and molecular markers. *Med  
33 Decis Making* 2008;8:53  
34  
35 18. Ferrario M, Sega R, Chatenoud L, et al. Time trends of major coronary risk factors in a  
36 northern Italian population (1986-1994). How remarkable are socio-economic differences in  
37 an industrialised low CHD incidence country? *Int J Epidemiol* 2001;30:285-291.  
38  
39 19. Cesana GC, De Vito G, Ferrario M, et al. Ambulatory blood pressure normalcy: The  
40 PAMELA Study. *J Hypertension Suppl* 1991;9:17-23.  
41  
42 20. WWW-publications from the WHO MONICA Project. MONICA Manual. Available at:  
43 <http://www.thl.fi/publications/monica/manual/index.htm>.  
44  
45 21. Fornari C, Madotto F, Demaria M, Romanelli A, Pepe P, Raciti M, Tancioni V, Chini F,  
46 Trerotoli P, Bartolomeo N, Serio G, Cesana G, Corrao G. Record-linkage procedures in  
47 epidemiology: an Italian multicentre study. *Epidemiol Prev* 2008;32:79-88.  
48  
49 22. Wilson PW, D'Agostino RB, Levy D, Belanger AM, Silbershatz H, Kannell WB.  
50 Prediction of coronary heart disease using risk factors category. *Circulation* 1998;97:1837-47  
51  
52 23. May S., Hosmer DW. A simplified method of calculating an overall Goodness-of-Fit test  
53 for the Cox proportional hazards model. *Lifetime Data Anal* 1998;4:109-120  
54  
55  
56  
57  
58  
59  
60

- 1  
2  
3  
4  
5  
6  
7  
8  
9 24. Chambless LE, Cummiskey CP, and Cui G. Several methods to assess improvement in  
10 risk prediction models: extension to survival analysis. *Statist med* 2011;30:22–28  
11  
12 25. Harrel FE, Lee KL and Marck DB. Tutorial in biostatistics: multivariable prognostic  
13 models: issues in developing models, evaluating assumptions and adequacy, and measuring  
14 and reducing errors. *Statist med* 1996;15:361–387  
15  
16 26. Harrel FE. R reference manual: Package ‘Hmisc’. Available at  
17 <http://cran.r-project.org/web/packages/Hmisc/Hmisc.pdf>  
18  
19 27. Menotti A, Lanti M. Coronary risk factors predicting early and late coronary events.  
20 *Heart* 2003;89:19-24  
21  
22 28. Bell K, Hayen A, McGeechan K, Neal B, Irwig L. Effects of additional blood pressure  
23 and lipids measurements on the prediction of cardiovascular risk. *Eur J Prev Cardiol*  
24 2012;19:1474-85  
25  
26 29. Camhi SM, Katzmarzyk PT. Tracking of cardiometabolic risk factor clustering from  
27 childhood to adulthood. *Int J Pediatr Obes* 2010;5:122-129  
28  
29 30. Greving JP, Visseren FLJ, de Wit GA, Algra A. Statin treatment for primary prevention  
30 of vascular disease: whom to treat? Cost-effectiveness analysis. *BMJ* 2011;342:d1672.  
31  
32  
33  
34  
35  
36  
37  
38  
39  
40  
41  
42  
43  
44  
45  
46  
47  
48  
49  
50  
51  
52  
53  
54  
55  
56  
57  
58  
59  
60

1  
2  
3  
4  
5  
6  
7  
8 **Tables and figures**

9 **Table 1.** Baseline characteristics (mean (SD) or %) of the study population and number of incident events, by gender.  
10 Men and women, 35-69 years old, CVD-free at baseline.

|                                           | Men (n=2574) | Women (n=2673) |
|-------------------------------------------|--------------|----------------|
| Age (years)                               | 50.8 (9.1)   | 50.3 (9)       |
| Years of schooling                        | 8.5 (4.2)    | 7.3 (3.4)      |
| Total Cholesterol (mmol/L)                | 5.8 (1.1)    | 5.8 (1.1)      |
| HDL-Cholesterol (mmol/L)                  | 1.3 (0.3)    | 1.6 (0.4)      |
| Body Mass Index (Kg/m <sup>2</sup> )      | 26.2 (3.5)   | 25.6 (4.7)     |
| Systolic Blood Pressure (mmHg)            | 134.8 (19.3) | 131.6 (20.2)   |
| Diastolic Blood Pressure (mmHg)           | 85.9 (10.6)  | 82.8 (10.8)    |
| Anti-hypertensive treatment (%)           | 11.8         | 16.0           |
| Fasting plasma glucose (mmol/L)           | 5.4 (1.3)    | 5.1 (1.2)      |
| Diabetes (%)                              | 6.7          | 4.0            |
| Current smoker (%)                        | 37.1         | 19.6           |
| Incident coronary event (n)               | 233          | 85             |
| Incident ischemic strokes (n)             | 99           | 43             |
| Incident CVD event (n)                    | 315          | 123            |
| 20-year absolute risk of CVD <sup>^</sup> | 16.1         | 6.1            |

36 <sup>^</sup>: Kaplan-Meier estimate.

1  
2  
3  
4  
5  
6  
7  
8  
9  
10  
11  
12  
13  
14  
15  
16  
17  
18  
19  
20  
21  
22  
23  
24  
25  
26  
27  
28  
29  
30  
31  
32  
33  
34  
35  
36  
37  
38  
39  
40  
41  
42  
43  
44  
45  
46  
47  
48  
49

**Table 2.** Discrimination ability for the 10-year and the 20-year risk prediction models. Men and women, 35-69 years old, CVD-free at baseline

|                                                               | Men                     |                         | Women                   |                         |
|---------------------------------------------------------------|-------------------------|-------------------------|-------------------------|-------------------------|
|                                                               | 10-year risk            | 20-year risk            | 10-year risk            | 20-year risk            |
| <b>AUC (95% CI)</b>                                           | 0.731<br>(0.702; 0.761) | 0.737<br>(0.713; 0.764) | 0.814<br>(0.779; 0.853) | 0.801<br>(0.771; 0.833) |
| <b>Subjects with predicted risk below the 20th percentile</b> |                         |                         |                         |                         |
| 20th percentile of risk                                       | 2.3                     | 6.3                     | 0.3                     | 1.1                     |
| Fraction of events* (%)                                       | 4.4                     | 5.1                     | 1.4                     | 2.0                     |
| Probability of event in the group^ (%)                        | 0.8                     | 3.7                     | 0.2                     | 0.9                     |
| <b>Subjects with predicted risk above the 80th percentile</b> |                         |                         |                         |                         |
| 80th percentile of risk                                       | 10.8                    | 26.8                    | 3.0                     | 10.1                    |
| Sensitivity* (%)                                              | 49.9                    | 45.6                    | 68.7                    | 62.0                    |
| Specificity (%)                                               | 82.4                    | 85.5                    | 81.1                    | 83.1                    |
| Probability of event in the group^ (%)                        | 19.4                    | 35.1                    | 7.5                     | 20.2                    |

The Area Under the ROC-curve (AUC) was estimated taking censorship into account, and adjusting for over-optimism (n=1000 bootstrap).  
\*: Probability of belonging to the group, given that the subject is a case. ^: Kaplan-Meier estimate of the probability of event in the group.

**Table 3a.** Identification of high risk subjects based on the 20-year risk prediction model with respect to the number of risk factors, according to strategies aiming to *i)* reducing the fraction of missed events; and *ii)* reducing un-necessary treatment. Men, 35-69 years old, CVD-free at baseline

|                                                         | Subjects at high risk |       | Fraction of missed events (%) | Specificity (%) | Probability of event* (%) | FP/TP Ratio |
|---------------------------------------------------------|-----------------------|-------|-------------------------------|-----------------|---------------------------|-------------|
|                                                         | n                     | %     |                               |                 |                           |             |
| <b>Strategy a: reduce the fraction of missed events</b> |                       |       |                               |                 |                           |             |
| All subjects                                            | 2574                  | 100.0 | 0.0                           | -               | 16.1                      | 5.2         |
| 1+ Major Risk Factor <sup>#</sup>                       | 1842                  | 71.6  | 13.7                          | 32.5            | 19.5                      | 4.1         |
| 20-year absolute risk > 10%                             | 1645                  | 63.9  | 9.1                           | 41.2            | 22.9                      | 3.4         |
| 20-year absolute risk > 15%                             | 1169                  | 45.4  | 22.1                          | 60.9            | 27.7                      | 2.6         |
| <b>Strategy b: reduce un-necessary treatment</b>        |                       |       |                               |                 |                           |             |
| 2+ Major Risk Factors <sup>#</sup>                      | 828                   | 32.2  | 50.4                          | 73.6            | 24.9                      | 3.0         |
| 20-year absolute risk > 20%                             | 841                   | 32.7  | 35.7                          | 73.7            | 31.7                      | 2.2         |
| 20-year absolute risk > 30%                             | 415                   | 16.1  | 62.6                          | 88.9            | 37.4                      | 1.7         |

“Missed” events are events occurring among subjects not classified at “high risk”, i.e. with 20-year absolute risk (or a number of risk factors) below the cut-off point.

\*: Kaplan-Meier estimate of the probability of event in the group (positive predicted value).

FP = Number of False Positives; TP = Number of True Positives

<sup>#</sup>: total cholesterol > 240 mg/dl; HDL-cholesterol < 40 [men] or < 50 [women] mg/dl; systolic blood pressure > 160 mmHg; smoking; diabetes



1  
2  
3  
4  
5  
6  
7  
8  
9  
10  
11  
12  
13  
14  
15  
16  
17  
18  
19  
20  
21  
22  
23  
24  
25  
26  
27  
28  
29  
30  
31  
32  
33  
34  
35  
36  
37  
38  
39  
40  
41  
42  
43  
44  
45  
46  
47  
48  
49

**Table 3b.** Identification of high risk subjects based on the 20-year risk prediction model with respect to the number of risk factors, according to strategies aiming to *i)* reducing the fraction of missed events; and *ii)* reducing un-necessary treatment. Women, 35-69 years old, CVD-free at baseline

|                                                         | Subjects at high risk |       | Fraction of missed events (%) | Specificity (%) | Probability of event* (%) | FP/TP Ratio |
|---------------------------------------------------------|-----------------------|-------|-------------------------------|-----------------|---------------------------|-------------|
|                                                         | n                     | %     |                               |                 |                           |             |
| <b>Strategy a: reduce the fraction of missed events</b> |                       |       |                               |                 |                           |             |
| All subjects                                            | 2673                  | 100.0 | 0.0                           | -               | 6.1                       | 15.3        |
| 1+ Major Risk Factor <sup>#</sup>                       | 1654                  | 61.9  | 17.7                          | 40.1            | 8.2                       | 11.3        |
| 20-year absolute risk > 2%                              | 1733                  | 64.8  | 4.5                           | 37.4            | 9.0                       | 10.1        |
| 20-year absolute risk > 5%                              | 1067                  | 39.9  | 14.7                          | 63.2            | 13.1                      | 6.6         |
| <b>Strategy b: reduce un-necessary treatment</b>        |                       |       |                               |                 |                           |             |
| 2+ Major Risk Factors <sup>#</sup>                      | 640                   | 23.9  | 42.3                          | 79.5            | 14.8                      | 5.8         |
| 20-year absolute risk > 8%                              | 698                   | 26.1  | 22.7                          | 77.1            | 18.2                      | 4.5         |
| 20-year absolute risk > 10%                             | 545                   | 20.4  | 32.1                          | 82.7            | 20.4                      | 3.9         |

“Missed” events are events occurring among subjects not classified at “high risk”, i.e. with 20-year absolute risk (or a number of risk factors) below the cut-off point.

\*: Kaplan-Meier estimate of the probability of event in the group (positive predicted value).

FP = Number of False Positives; TP = Number of True Positives

<sup>#</sup>: total cholesterol > 240 mg/dl; HDL-cholesterol < 40 [men] or < 50 [women] mg/dl; systolic blood pressure > 160 mmHg; smoking; diabetes

1  
2  
3  
4  
5  
6  
7  
8 **Figure 1:** Decision curve for the 20-year risk prediction model in the CAMUNI population, Northern Italy.  
9 Men (left) and women (right), 35 to 69 years old, free of CVD at baseline.  
10  
11  
12  
13  
14  
15  
16  
17  
18  
19  
20  
21  
22  
23  
24  
25  
26  
27  
28  
29  
30  
31  
32  
33  
34  
35  
36

37 Net Benefit:  $(TP - w * FP) / n$ , where TP = True Positive; FP = False Positive;  $w = (\text{Absolute risk threshold}) / (1 - (\text{Absolute risk threshold}))$ ; n=sample size  
38 Number of risk factors: total cholesterol >240 mg/dl; HDL-cholesterol <40 [men] or <50 [women] mg/dl; systolic blood pressure >160 mmHg; smoking; diabetes  
39  
40  
41  
42  
43  
44  
45

22

1  
2  
3  
4  
5  
6  
7  
8  
9  
10  
11  
12  
13  
14  
15  
16  
17  
18  
19  
20  
21  
22  
23  
24  
25  
26  
27  
28  
29  
30  
31  
32  
33  
34  
35  
36  
37  
38  
39  
40  
41  
42  
43  
44  
45  
46  
47

**Supplementary material**

For peer review only

**Table S1:** Beta-coefficients, standard errors and baseline survival for the 20-year risk prediction model in Northern Italy. Men and women, 35 to 69 years old, free of CVD at baseline.

|                                                          | Men   |         |         | Women |         |         |
|----------------------------------------------------------|-------|---------|---------|-------|---------|---------|
|                                                          | Beta  | SE      | p-value | Beta  | SE      | p-value |
| <b>Age (years)</b>                                       | 0.058 | 0.008   | <.0001  | 0.084 | 0.014   | <.0001  |
| <b>Total Cholesterol<sup>^</sup></b>                     |       |         |         |       |         |         |
| 200-240 mg/dl                                            | 0.388 | 0.161   |         | 0.553 | 0.287   |         |
| 240-280 mg/dl                                            | 0.690 | 0.167   | <.0001  | 0.607 | 0.310   | 0.027   |
| > 280 mg/dl                                              | 0.923 | 0.198   |         | 0.996 | 0.328   |         |
| <b>HDL-Cholesterol<sup>°</sup></b>                       |       |         |         |       |         |         |
| <45 mg/dl                                                | 0.403 | 0.160   |         | 0.804 | 0.250   |         |
| 45-50 mg/dl                                              | 0.367 | 0.186   | 0.013   | 0.364 | 0.309   | 0.015   |
| 50-60 mg/dl                                              | 0.024 | 0.177   |         | 0.261 | 0.225   |         |
| <b>Systolic Blood Pressure (mmHg)</b>                    | 0.011 | 0.003   | 0.0003  | 0.015 | 0.005   | 0.001   |
| <b>Anti-hypertensive treatment (yes/no)</b>              | 0.247 | 0.154   | 0.11    | 0.267 | 0.209   | 0.20    |
| <b>Smoking (yes/no)</b>                                  | 0.521 | 0.117   | <.0001  | 0.994 | 0.216   | <.0001  |
| <b>Diabetes (yes/no)</b>                                 | 0.744 | 0.163   | <.0001  | 1.020 | 0.249   | <.0001  |
| <b>Baseline 20-year survival (<math>S_0(20)</math>)*</b> |       | 0.94168 |         |       | 0.98502 |         |
| <b>G(<math>\mu</math>)</b>                               |       | 4.35638 |         |       | 6.20915 |         |
| <b>Calibration Slope</b>                                 |       | 0.948   |         |       | 0.937   |         |

SE = Standard Error. <sup>^</sup>: reference group: total cholesterol  $\leq$  200 mg/dl. <sup>°</sup>: reference group: HDL-cholesterol  $>$  60 mg/dl. \*: at the mean value for continuous RFs, and at the reference class for categorical variables. 20-year risk:  $1 - S_0(20)^{\exp(\sum \beta X - G(\mu))}$ . Calibration slope: correction term to be used in different population to shrink the beta-coefficients. See reference [25] for more details. The risk model should be used within the following range for continuous risk factors: total cholesterol 135-330 mg/dl; HDL-cholesterol 30-100 mg/dl; systolic blood pressure 100-190 mmHg.

Figure S1: Calibration plot for the final 20-year risk model. Men (left) and women (right), 35 to 69 years old, free of CVD at baseline.

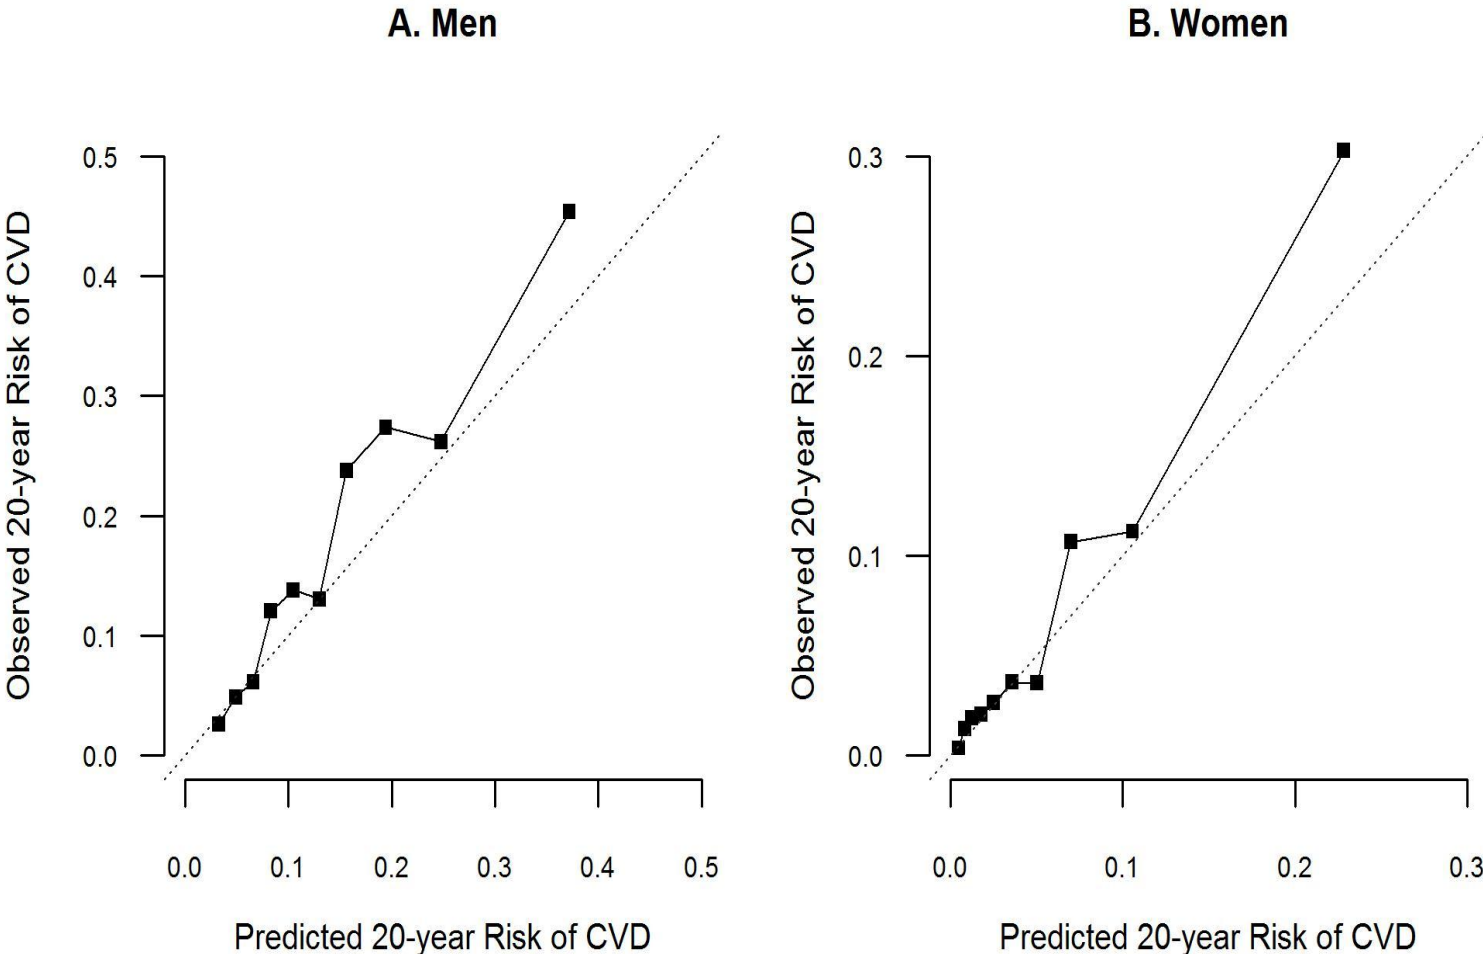

**Figure S2:** Distribution of predicted 10-year and 20-year risk of first major CVD event, according to the number of risk factors. Men (left) and women (right), 35 to 49 years old, free of CVD at baseline.

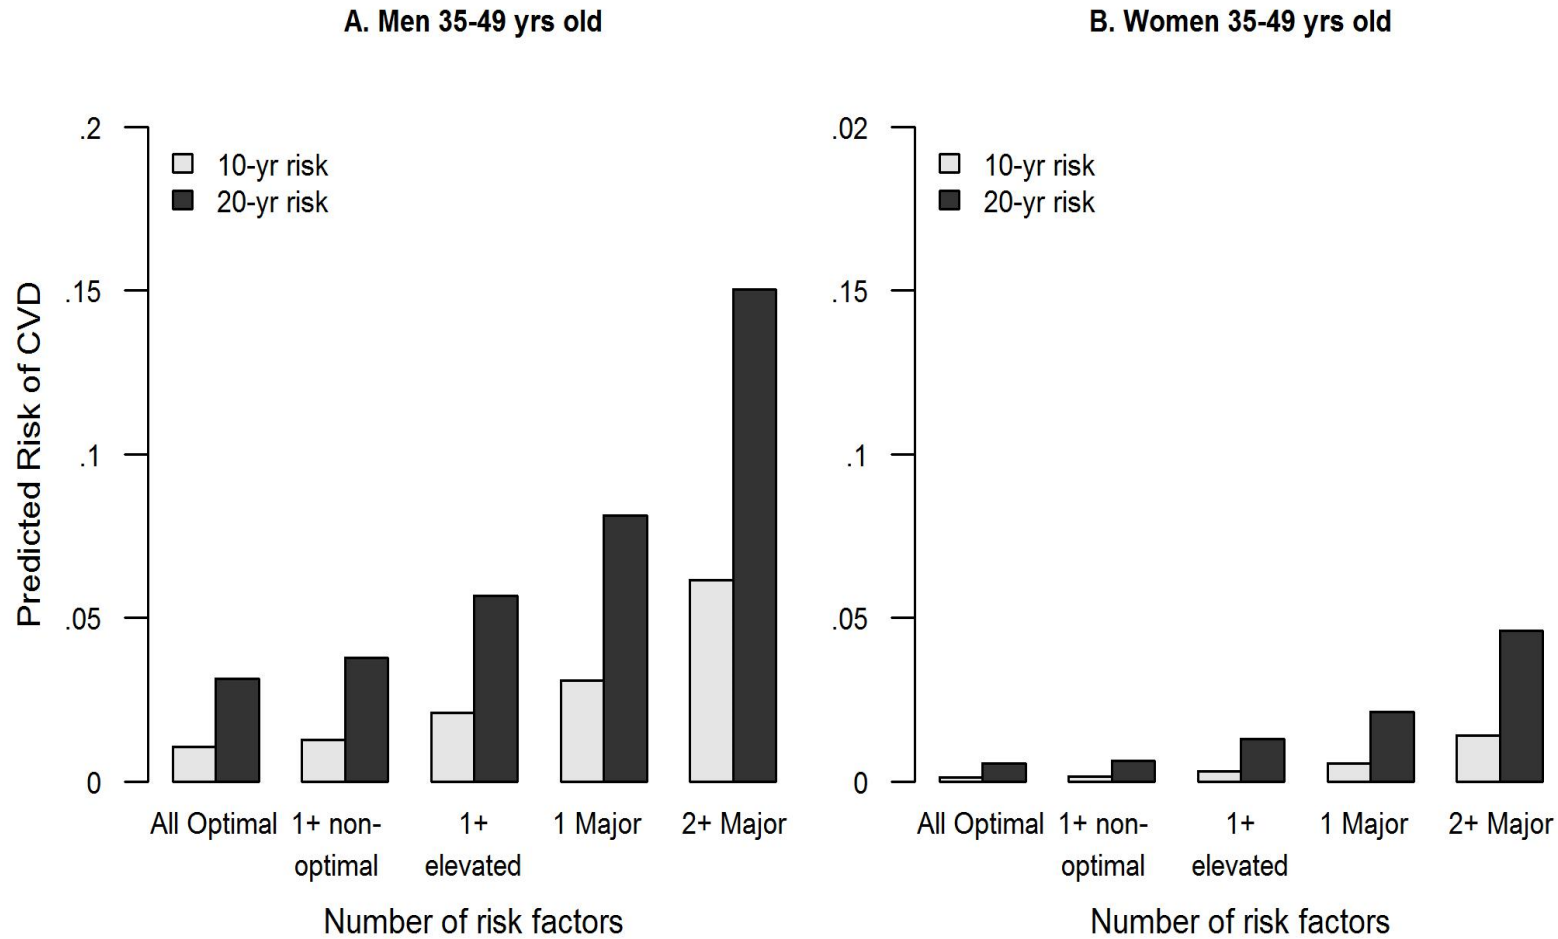

1  
2  
3 Risk factors stratification derived from Lloyd-Jones [7].

4 All optimal: total cholesterol <180 mg/dl, HDL-Cholesterol  $\geq$  40 mg/dl [men] or  $\geq$  50 mg/dl [women], blood pressure <120/80 mmHg, non smoker, non diabetic;

5 1+ non-optimal: total cholesterol 180 to 199 mg/dl, systolic blood pressure 120 to 139 mmHg, diastolic blood pressure 80 to 89 mmHg, non smoker, non diabetic

6 1+ elevated: total cholesterol 200 to 239 mg/dl, systolic blood pressure 140 to 159 mmHg, diastolic blood pressure 90 to 99 mmHg, non smoker, non diabetic

7 Major risk factor: total cholesterol  $\geq$ 240 mg/dl, HDL-Cholesterol <40 mg/dl [men] or <50 mg/dl [women], systolic blood pressure  $\geq$ 160 mmHg or treatment,  
8 diastolic blood pressure  $\geq$ 100 mmHg, smoker, or diabetic  
9

10  
11  
12  
13  
14  
15  
16  
17  
18  
19  
20  
21  
22  
23  
24  
25  
26  
27  
28  
29  
30  
31  
32  
33  
34  
35  
36  
37  
38  
39  
40  
41  
42  
43  
44  
45  
46  
47

For peer review only

**Table S2:** Baseline characteristics of the study population, by study cohort, for risk factors included in the risk prediction model. Men and women, 35 to 69 years old, free of CVD at baseline.

|                                | Cohort study name |              |              |              |
|--------------------------------|-------------------|--------------|--------------|--------------|
|                                | MONICA 1          | MONICA 2     | PAMELA       | MONICA 3     |
| Recruitment period             | 1986-87           | 1989-90      | 1990-93      | 1993-94      |
| Number of subjects             | 1259              | 1255         | 1442         | 1291         |
| Age, years                     | 49.4 (8.6)        | 49.6 (8.8)   | 52.5 (9.8)   | 50.3 (8.7)   |
| Men, %                         | 48.0              | 49.2         | 49.9         | 49.0         |
| Total cholesterol, mg/dl       | 216.5 (43.3)      | 215.7 (42.7) | 228.6 (42.3) | 229.9 (41.7) |
| HDL-cholesterol, mg/dl         | 55.5 (14.4)       | 56.2 (14.6)  | 55.9 (15.9)  | 57.1 (15.1)  |
| Systolic Blood Pressure, mmHg  | 136 (20)          | 132.3 (19.3) | 133.6 (20)   | 130.6 (19.7) |
| Anti-hypertensive treatment, % | 11.0              | 13.7         | 17.6         | 12.8         |
| Current smokers, %             | 30.7              | 27.5         | 28.3         | 26.3         |
| Diabetes, %                    | 6.4               | 6.5          | 4.4          | 4.3          |

Data are mean values (SD) for continuous variables, and % for dichotomous risk factors.



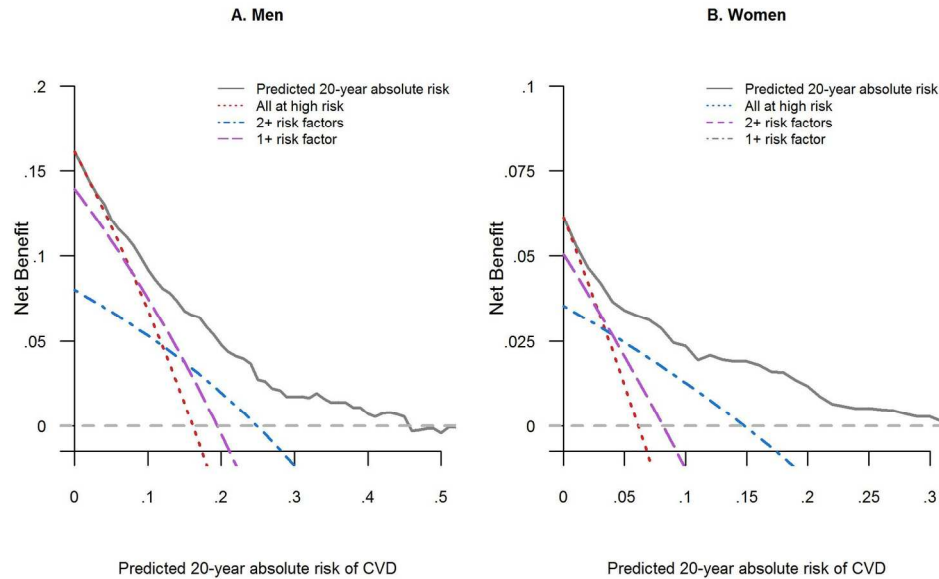

Figure 1: Decision curve for the 20-year risk prediction model in the CAMUNI population, Northern Italy. Men (left) and women (right), 35 to 69 years old, free of CVD at baseline.

Net Benefit:  $(TP - w \cdot FP) / n$ , where TP = True Positive; FP = False Positive;  $w = (\text{Absolute risk threshold}) / (1 - \text{Absolute risk threshold})$ ;  $n = \text{sample size}$

Number of risk factors: total cholesterol >240 mg/dl; HDL-cholesterol <40 [men] or <50 [women] mg/dl; systolic blood pressure >160 mmHg; smoking; diabetes

180x120mm (300 x 300 DPI)

only

1 **Supplementary material for the paper:**

2 **Long-term prediction of major coronary or ischemic stroke event in a low-incidence**

3 **European population: model development and evaluation of clinical utility.**

4 STROBE Statement—Checklist of items that should be included in reports of *cohort studies*

5

6

7

8

9

|                          | Item No | Recommendation                                                                                                                                                                       | Actions                                                                                                                                                                                                                                         |
|--------------------------|---------|--------------------------------------------------------------------------------------------------------------------------------------------------------------------------------------|-------------------------------------------------------------------------------------------------------------------------------------------------------------------------------------------------------------------------------------------------|
| Title and abstract       | 1       | (a) Indicate the study's design with a commonly used term in the title or the abstract                                                                                               | The study setting is clearly stated in the abstract.                                                                                                                                                                                            |
|                          |         | (b) Provide in the abstract an informative and balanced summary of what was done and what was found                                                                                  | Done                                                                                                                                                                                                                                            |
| <b>Introduction</b>      |         |                                                                                                                                                                                      |                                                                                                                                                                                                                                                 |
| Background/rationale     | 2       | Explain the scientific background and rationale for the investigation being reported                                                                                                 | See the introduction section at pages 3-4                                                                                                                                                                                                       |
| Objectives               | 3       | State specific objectives, including any prespecified hypotheses                                                                                                                     | See page 4, end of introduction section                                                                                                                                                                                                         |
| <b>Methods</b>           |         |                                                                                                                                                                                      |                                                                                                                                                                                                                                                 |
| Study design             | 4       | Present key elements of study design early in the paper                                                                                                                              | See the Methods section (pages 4-7)                                                                                                                                                                                                             |
| Setting                  | 5       | Describe the setting, locations, and relevant dates, including periods of recruitment, exposure, follow-up, and data collection                                                      | Relevant information on cohorts setting, location and periods of recruitment are provided in the paragraphs "Study population" (page 4), "Baseline assessment of risk factors" (page 4) and "Study endpoint and follow-up procedures" (page 5). |
| Participants             | 6       | (a) Give the eligibility criteria, and the sources and methods of selection of participants. Describe methods of follow-up                                                           | See the paragraphs "Study population" (page 4) and "Study endpoint and follow-up procedures" (page 5).                                                                                                                                          |
|                          |         | (b) For matched studies, give matching criteria and number of exposed and unexposed                                                                                                  | Not applicable                                                                                                                                                                                                                                  |
| Variables                | 7       | Clearly define all outcomes, exposures, predictors, potential confounders, and effect modifiers. Give diagnostic criteria, if applicable                                             | See the paragraph "Statistical analysis", page 6-7                                                                                                                                                                                              |
| Data sources/measurement | 8*      | For each variable of interest, give sources of data and details of methods of assessment (measurement). Describe comparability of assessment methods if there is more than one group | See paragraphs "Baseline assessment of risk factors" (page 4), and "Statistical analysis" (page 6-7). Exposure group: not applicable for this analysis.                                                                                         |
| Bias                     | 9       | Describe any efforts to address potential sources of bias                                                                                                                            | See the Methods section.                                                                                                                                                                                                                        |
| Study size               | 10      | Explain how the study size was arrived at                                                                                                                                            | See the first period in the "Results" section (page 7)                                                                                                                                                                                          |
| Quantitative             | 11      | Explain how quantitative variables were                                                                                                                                              | See the "Statistical Analysis" paragraph                                                                                                                                                                                                        |

10

11

12

13

14

15

16

17

18

19

20

21

22

23

24

25

26

27

28

29

30

31

32

33

34

35

36

37

38

39

40

41

42

43

44

45

46

47

48

49

50

51

52

53

54

55

56

57

58

59

60

|    |                     |     |                                                                                          |
|----|---------------------|-----|------------------------------------------------------------------------------------------|
| 1  | variables           |     | handled in the analyses. If applicable, (page 6)                                         |
| 2  |                     |     | describe which groupings were chosen and                                                 |
| 3  |                     |     | why                                                                                      |
| 4  | Statistical methods | 12  |                                                                                          |
| 5  |                     |     | (a) Describe all statistical methods, including See the “Statistical Analysis” paragraph |
| 6  |                     |     | those used to control for confounding (page 6)                                           |
| 7  |                     |     | (b) Describe any methods used to examine See the “Statistical Analysis” paragraph        |
| 8  |                     |     | subgroups and interactions (page 6)                                                      |
| 9  |                     |     | (c) Explain how missing data were addressed See the first line in the “Results” section  |
| 10 |                     |     | (page 7)                                                                                 |
| 11 |                     |     | (d) If applicable, explain how loss to follow- See the “Statistical Analysis” paragraph  |
| 12 |                     |     | up was addressed (page 6) for details on the survival analysis                           |
| 13 |                     |     | techniques                                                                               |
| 14 |                     |     | (e) Describe any sensitivity analyses Not applicable                                     |
| 15 |                     |     |                                                                                          |
| 16 |                     |     |                                                                                          |
| 17 | <b>Results</b>      |     |                                                                                          |
| 18 | Participants        | 13* |                                                                                          |
| 19 |                     |     | (a) Report numbers of individuals at each Participation rates are reported in the        |
| 20 |                     |     | stage of study—eg numbers potentially paragraph “Study population” (page 4).             |
| 21 |                     |     | eligible, examined for eligibility, confirmed Exposure group: not applicable for this    |
| 22 |                     |     | eligible, included in the study, completing analysis.                                    |
| 23 |                     |     | follow-up, and analysed                                                                  |
| 24 |                     |     | (b) Give reasons for non-participation at each Not applicable                            |
| 25 |                     |     | stage                                                                                    |
| 26 |                     |     | (c) Consider use of a flow diagram Not applicable                                        |
| 27 |                     |     |                                                                                          |
| 28 | Descriptive data    | 14* |                                                                                          |
| 29 |                     |     | (a) Give characteristics of study participants See Table 1. Exposure group: not          |
| 30 |                     |     | (eg demographic, clinical, social) and applicable for this analysis.                     |
| 31 |                     |     | information on exposures and potential                                                   |
| 32 |                     |     | confounders                                                                              |
| 33 |                     |     | (b) Indicate number of participants with See the “Results” section, first period         |
| 34 |                     |     | missing data for each variable of interest (page 7). Exposure group: not applicable      |
| 35 |                     |     | for this analysis.                                                                       |
| 36 |                     |     | (c) Summarise follow-up time (eg, average “Results” section, second period (page 7).     |
| 37 |                     |     | and total amount) Exposure group: not applicable for this                                |
| 38 |                     |     | analysis..                                                                               |
| 39 |                     |     |                                                                                          |
| 40 | Outcome data        | 15* |                                                                                          |
| 41 |                     |     | Report numbers of outcome events or Number of events, by type, are reported in           |
| 42 |                     |     | summary measures over time Table 1. Exposure group: not applicable                       |
| 43 |                     |     | for this analysis.                                                                       |
| 44 | Main results        | 16  |                                                                                          |
| 45 |                     |     | (a) Give unadjusted estimates and, if The study model is reported in Table S1,           |
| 46 |                     |     | applicable, confounder-adjusted estimates and supplementary material; the analysis is    |
| 47 |                     |     | their precision (eg, 95% confidence interval). multivariable by nature.                  |
| 48 |                     |     | Make clear which confounders were adjusted                                               |
| 49 |                     |     | for and why they were included                                                           |
| 50 |                     |     | (b) Report category boundaries when Not applicable                                       |
| 51 |                     |     | continuous variables were categorized                                                    |
| 52 |                     |     | (c) If relevant, consider translating estimates Not applicable                           |
| 53 |                     |     | of relative risk into absolute risk for a                                                |
| 54 |                     |     | meaningful time period                                                                   |
| 55 |                     |     |                                                                                          |
| 56 | Other analyses      | 17  |                                                                                          |
| 57 |                     |     | Report other analyses done—eg analyses of Not applicable                                 |
| 58 |                     |     | subgroups and interactions, and sensitivity                                              |
| 59 |                     |     | analyses                                                                                 |
| 60 |                     |     |                                                                                          |

| <b>Discussion</b>        |    |                                                                                                                                                                            |                                                              |
|--------------------------|----|----------------------------------------------------------------------------------------------------------------------------------------------------------------------------|--------------------------------------------------------------|
| Key results              | 18 | Summarise key results with reference to study objectives                                                                                                                   | See the first part of the Discussion section, page 9         |
| Limitations              | 19 | Discuss limitations of the study, taking into account sources of potential bias or imprecision. Discuss both direction and magnitude of any potential bias                 | Study limitations are reported and discussed at pages 11-12. |
| Interpretation           | 20 | Give a cautious overall interpretation of results considering objectives, limitations, multiplicity of analyses, results from similar studies, and other relevant evidence | Done                                                         |
| Generalisability         | 21 | Discuss the generalisability (external validity) of the study results                                                                                                      | See pages 11-12                                              |
| <b>Other information</b> |    |                                                                                                                                                                            |                                                              |
| Funding                  | 22 | Give the source of funding and the role of the funders for the present study and, if applicable, for the original study on which the present article is based              | Source of funding is reported at page 12.                    |

\*Give information separately for exposed and unexposed groups.

**Note:** An Explanation and Elaboration article discusses each checklist item and gives methodological background and published examples of transparent reporting. The STROBE checklist is best used in conjunction with this article (freely available on the Web sites of PLoS Medicine at <http://www.plosmedicine.org/>, Annals of Internal Medicine at <http://www.annals.org/>, and Epidemiology at <http://www.epidem.com/>). Information on the STROBE Initiative is available at <http://www.strobe-statement.org>.
